# Supplementary material for: Searching for molecular hypoxia sensors among oxygen-dependent enzymes
Source: eLife. 2023 Jul 26;12:e87705. doi: 10.7554/eLife.87705 (PMC10371230; doi:10.7554/eLife.87705)
Supplement: Supplementary file 1. [file elife-87705-supp1.xlsx]

## Sheet: Sheet1
Category	Subcategory by catalytic center	Uniprot id	Gene Symbol	Gene names	Protein names	Catalyzed reactions	Metal center	Cofactor as metal ligand	Residues as metal ligand	Note
Dioxygenase	2-OG dependent dioxygenase	Q9GZT9	EGLN1	EGLN1 C1orf12 PNAS-118 PNAS-137	Egl nine homolog 1 (EC 1.14.11.29) (Hypoxia-inducible factor prolyl hydroxylase 2) (HIF-PH2) (HIF-prolyl hydroxylase 2) (HPH-2) (Prolyl hydroxylase domain-containing protein 2) (PHD2) (SM-20)	2-oxoglutarate + [hypoxia-inducible factor α subunit]-L-proline + O2 = [hypoxia-inducible factor α subunit]-trans-4-hydroxy-L-proline + CO2 + succinate	Fe	2-OG	His313, Asp315, His374	Discussed in section 'Direct HIF modulators'
Dioxygenase	2-OG dependent dioxygenase	Q96KS0	EGLN2	EGLN2 EIT6	Egl nine homolog 2 (EC 1.14.11.29) (Estrogen-induced tag 6) (EIT-6) (HPH-3) (Hypoxia-inducible factor prolyl hydroxylase 1) (HIF-PH1) (HIF-prolyl hydroxylase 1) (HPH-1) (Prolyl hydroxylase domain-containing protein 1) (PHD1)	2-oxoglutarate + [hypoxia-inducible factor α subunit]-L-proline + O2 = [hypoxia-inducible factor α subunit]-trans-4-hydroxy-L-proline + CO2 + succinate	Fe	2-OG	His297, Asp299, His358	Discussed in section 'Direct HIF modulators'
Dioxygenase	2-OG dependent dioxygenase	Q9H6Z9	EGLN3	EGLN3	Egl nine homolog 3 (EC 1.14.11.29) (HPH-1) (Hypoxia-inducible factor prolyl hydroxylase 3) (HIF-PH3) (HIF-prolyl hydroxylase 3) (HPH-3) (Prolyl hydroxylase domain-containing protein 3) (PHD3)	2-oxoglutarate + [hypoxia-inducible factor α subunit]-L-proline + O2 = [hypoxia-inducible factor α subunit]-trans-4-hydroxy-L-proline + CO2 + succinate	Fe	2-OG	His135, Asp137, His196	Discussed in section 'Direct HIF modulators'
Dioxygenase	2-OG dependent dioxygenase	Q9NWT6	HIF1AN	HIF1AN FIH1	Hypoxia-inducible factor 1-alpha inhibitor (EC 1.14.11.30) (EC 1.14.11.n4) (Factor inhibiting HIF-1) (FIH-1) (Hypoxia-inducible factor asparagine hydroxylase)	2-oxoglutarate + [hypoxia-inducible factor alpha subunit]-L-asparagine + O2 = [hypoxia-inducible factor alpha subunit]-(3S)-3-hydroxy-L-asparagine + CO2 + succinate	Fe	2-OG	His199, Asp201, His279	Discussed in section 'Direct HIF modulators'
Dioxygenase	2-OG dependent dioxygenase	Q9Y2K7	KDM2A	KDM2A CXXC8 FBL7 FBXL11 JHDM1A KIAA1004	Lysine-specific demethylase 2A (EC 1.14.11.27) (CXXC-type zinc finger protein 8) (F-box and leucine-rich repeat protein 11) (F-box protein FBL7) (F-box protein Lilina) (F-box/LRR-repeat protein 11) (JmjC domain-containing histone demethylation protein 1A) ([Histone-H3]-lysine-36 demethylase 1A)	2 2-oxoglutarate + N6,N6-dimethyl-L-lysyl36-[histone H3] + 2 O2 = 2 CO2 + 2 formaldehyde + L-lysyl36-[histone H3] + 2 succinate	Fe	2-OG	His212, Asp214, His284
Dioxygenase	2-OG dependent dioxygenase	Q8NHM5	KDM2B	KDM2B CXXC2 FBL10 FBXL10 JHDM1B PCCX2	Lysine-specific demethylase 2B (EC 1.14.11.27) (CXXC-type zinc finger protein 2) (F-box and leucine-rich repeat protein 10) (F-box protein FBL10) (F-box/LRR-repeat protein 10) (JmjC domain-containing histone demethylation protein 1B) (Jumonji domain-containing EMSY-interactor methyltransferase motif protein) (Protein JEMMA) (Protein-containing CXXC domain 2) ([Histone-H3]-lysine-36 demethylase 1B)	2 2-oxoglutarate + N6,N6-dimethyl-L-lysyl36-[histone H3] + 2 O2 = 2 CO2 + 2 formaldehyde + L-lysyl36-[histone H3] + 2 succinate	Fe	2-OG	His242, Asp244, His314
Dioxygenase	2-OG dependent dioxygenase	Q9Y4C1	KDM3A	KDM3A JHDM2A JMJD1 JMJD1A KIAA0742 TSGA	Lysine-specific demethylase 3A (EC 1.14.11.-) (JmjC domain-containing histone demethylation protein 2A) (Jumonji domain-containing protein 1A)	2 2-oxoglutarate + N6,N6-dimethyl-L-lysyl9-[histone H3] + 2 O2 = 2 CO2 + 2 formaldehyde + L-lysyl9-[histone H3] + 2 succinate	Fe	2-OG	His1120, Asp1122, His1249	Discussed in section 'Epigenetic modulators'
Dioxygenase	2-OG dependent dioxygenase	Q7LBC6	KDM3B	KDM3B C5orf7 JHDM2B JMJD1B KIAA1082	Lysine-specific demethylase 3B (EC 1.14.11.-) (JmjC domain-containing histone demethylation protein 2B) (Jumonji domain-containing protein 1B) (Nuclear protein 5qNCA)	2 2-oxoglutarate + N6,N6-dimethyl-L-lysyl9-[histone H3] + 2 O2 = 2 CO2 + 2 formaldehyde + L-lysyl9-[histone H3] + 2 succinate	Fe	2-OG	His1560, Asp1562, His1689
Dioxygenase	2-OG dependent dioxygenase	Q15652	JMJD1C	JMJD1C JHDM2C KIAA1380 TRIP8	Probable JmjC domain-containing histone demethylation protein 2C (EC 1.14.11.-) (Jumonji domain-containing protein 1C) (Thyroid receptor-interacting protein 8) (TR-interacting protein 8) (TRIP-8)	Probable histone demethylase that specifically demethylates 'Lys-9' of histone H3	Fe	2-OG
Dioxygenase	2-OG dependent dioxygenase	O75164	KDM4A	KDM4A JHDM3A JMJD2 JMJD2A KIAA0677	Lysine-specific demethylase 4A (EC 1.14.11.-) (JmjC domain-containing histone demethylation protein 3A) (Jumonji domain-containing protein 2A)	2 2-oxoglutarate + N6,N6,N6-trimethyl-L-lysyl9-[histone H3] + 2 O2 = 2 CO2 + 2 formaldehyde + N6-methyl-L-lysyl9-[histone H3] + 2 succinate, 2 2-oxoglutarate + N6,N6,N6-trimethyl-L-lysyl36-[histone H3] + 2 O2 = 2 CO2 + 2 formaldehyde + N6-methyl-L-lysyl36-[histone H3] + 2 succinate	Fe	2-OG	His188, Glu190, His276	Discussed in section 'Epigenetic modulators'
Dioxygenase	2-OG dependent dioxygenase	O94953	KDM4B	KDM4B JHDM3B JMJD2B KIAA0876	Lysine-specific demethylase 4B (EC 1.14.11.-) (JmjC domain-containing histone demethylation protein 3B) (Jumonji domain-containing protein 2B)	2 2-oxoglutarate + N6,N6,N6-trimethyl-L-lysyl9-[histone H3] + 2 O2 = 2 CO2 + 2 formaldehyde + N6-methyl-L-lysyl9-[histone H3] + 2 succinate	Fe	2-OG	His189, Glu191, His277
Dioxygenase	2-OG dependent dioxygenase	Q9H3R0	KDM4C	KDM4C GASC1 JHDM3C JMJD2C KIAA0780	Lysine-specific demethylase 4C (EC 1.14.11.-) (Gene amplified in squamous cell carcinoma 1 protein) (GASC-1 protein) (JmjC domain-containing histone demethylation protein 3C) (Jumonji domain-containing protein 2C)	2 2-oxoglutarate + N6,N6,N6-trimethyl-L-lysyl9-[histone H3] + 2 O2 = 2 CO2 + 2 formaldehyde + N6-methyl-L-lysyl9-[histone H3] + 2 succinate	Fe	2-OG	His190, Glu192, His278
Dioxygenase	2-OG dependent dioxygenase	Q6B0I6	KDM4D	KDM4D JHDM3D JMJD2D	Lysine-specific demethylase 4D (EC 1.14.11.-) (JmjC domain-containing histone demethylation protein 3D) (Jumonji domain-containing protein 2D)	2 2-oxoglutarate + N6,N6,N6-trimethyl-L-lysyl9-[histone H3] + 2 O2 = 2 CO2 + 2 formaldehyde + N6-methyl-L-lysyl9-[histone H3] + 2 succinate	Fe	2-OG	His192, Glu194, His280
Dioxygenase	2-OG dependent dioxygenase	B2RXH2	KDM4E	KDM4E KDM4DL	Lysine-specific demethylase 4E (EC 1.14.11.-) (KDM4D-like protein) (Lysine-specific demethylase 4D-like)	2 2-oxoglutarate + N6,N6,N6-trimethyl-L-lysyl9-[histone H3] + 2 O2 = 2 CO2 + 2 formaldehyde + N6-methyl-L-lysyl9-[histone H3] + 2 succinate	Fe	2-OG	His189, Glu191, His277
Dioxygenase	2-OG dependent dioxygenase	P29375	KDM5A	KDM5A JARID1A RBBP2 RBP2	Lysine-specific demethylase 5A (EC 1.14.11.-) (Histone demethylase JARID1A) (Jumonji/ARID domain-containing protein 1A) (Retinoblastoma-binding protein 2) (RBBP-2)	3 2-oxoglutarate + N6,N6,N6-trimethyl-L-lysyl4-[histone H3] + 3 O2 = 3 CO2 + 3 formaldehyde + L-lysyl4-[histone H3] + 3 succinate	Fe	2-OG	His483, Glu485, His571	Discussed in section 'Epigenetic modulators'
Dioxygenase	2-OG dependent dioxygenase	Q9UGL1	KDM5B	KDM5B JARID1B PLU1 RBBP2H1	Lysine-specific demethylase 5B (EC 1.14.11.-) (Cancer/testis antigen 31) (CT31) (Histone demethylase JARID1B) (Jumonji/ARID domain-containing protein 1B) (PLU-1) (Retinoblastoma-binding protein 2 homolog 1) (RBP2-H1)	3 2-oxoglutarate + N6,N6,N6-trimethyl-L-lysyl4-[histone H3] + 3 O2 = 3 CO2 + 3 formaldehyde + L-lysyl4-[histone H3] + 3 succinate	Fe	2-OG	His499, Glu501, His587
Dioxygenase	2-OG dependent dioxygenase	P41229	KDM5C	KDM5C DXS1272E JARID1C SMCX XE169	Lysine-specific demethylase 5C (EC 1.14.11.-) (Histone demethylase JARID1C) (Jumonji/ARID domain-containing protein 1C) (Protein SmcX) (Protein Xe169)	3 2-oxoglutarate + N6,N6,N6-trimethyl-L-lysyl4-[histone H3] + 3 O2 = 3 CO2 + 3 formaldehyde + L-lysyl4-[histone H3] + 3 succinate	Fe	2-OG	His514, Glu516, His602	Discussed in section 'Epigenetic modulators'
Dioxygenase	2-OG dependent dioxygenase	Q9BY66	KDM5D	KDM5D HY HYA JARID1D KIAA0234 SMCY	Lysine-specific demethylase 5D (EC 1.14.11.-) (Histocompatibility Y antigen) (H-Y) (Histone demethylase JARID1D) (Jumonji/ARID domain-containing protein 1D) (Protein SmcY)	3 2-oxoglutarate + N6,N6,N6-trimethyl-L-lysyl4-[histone H3] + 3 O2 = 3 CO2 + 3 formaldehyde + L-lysyl4-[histone H3] + 3 succinate	Fe	2-OG	His504, Glu506, His592
Dioxygenase	2-OG dependent dioxygenase	O15550	KDM6A	KDM6A UTX	Lysine-specific demethylase 6A (EC 1.14.11.-) (Histone demethylase UTX) (Ubiquitously-transcribed TPR protein on the X chromosome) (Ubiquitously-transcribed X chromosome tetratricopeptide repeat protein)	2 2-oxoglutarate + N6,N6,N6-trimethyl-L-lysyl27-[histone H3] + 2 O2 = 2 CO2 + 2 formaldehyde + N6-methyl-L-lysyl27-[histone H3] + 2 succinate	Fe	2-OG	His1146, Glu1148, His1226	Discussed in section 'Epigenetic modulators'
Dioxygenase	2-OG dependent dioxygenase	O15054	KDM6B	KDM6B JMJD3 KIAA0346	Lysine-specific demethylase 6B (EC 1.14.11.-) (JmjC domain-containing protein 3) (Jumonji domain-containing protein 3) (Lysine demethylase 6B)	2 2-oxoglutarate + N6,N6,N6-trimethyl-L-lysyl27-[histone H3] + 2 O2 = 2 CO2 + 2 formaldehyde + N6-methyl-L-lysyl27-[histone H3] + 2 succinate	Fe	2-OG	His1390, Glu1392, His1470
Dioxygenase	2-OG dependent dioxygenase	O14607	UTY	UTY KDM6C	Histone demethylase UTY (EC 1.14.11.-) (Ubiquitously-transcribed TPR protein on the Y chromosome) (Ubiquitously-transcribed Y chromosome tetratricopeptide repeat protein)	2 2-oxoglutarate + N6,N6,N6-trimethyl-L-lysyl27-[histone H3] + 2 O2 = 2 CO2 + 2 formaldehyde + N6-methyl-L-lysyl27-[histone H3] + 2 succinate	Fe	2-OG	His1093, Glu1095, His1173
Dioxygenase	2-OG dependent dioxygenase	Q6ZMT4	KDM7A	KDM7A JHDM1D KDM7 KIAA1718	Lysine-specific demethylase 7A (EC 1.14.11.-) (JmjC domain-containing histone demethylation protein 1D) (Lysine-specific demethylase 7)	2 2-oxoglutarate + N6,N6-dimethyl-L-lysyl9-[histone H3] + 2 O2 = 2 CO2 + 2 formaldehyde + L-lysyl9-[histone H3] + 2 succinate, 2 2-oxoglutarate + N6,N6-dimethyl-L-lysyl27-[histone H3] + 2 O2 = 2 CO2 + 2 formaldehyde + L-lysyl27-[histone H3] + 2 succinate, 2-oxoglutarate + N6,N6-dimethyl-L-lysyl36-[histone H3] + O2 = CO2 + formaldehyde + N6-methyl-L-lysyl36-[histone H3] + succinate, 2-oxoglutarate…	Fe	2-OG	His282, Asp284, His354
Dioxygenase	2-OG dependent dioxygenase	Q9UPP1	PHF8	PHF8 KIAA1111 ZNF422	Histone lysine demethylase PHF8 (EC 1.14.11.27) (PHD finger protein 8)	2 2-oxoglutarate + N6,N6-dimethyl-L-lysyl36-[histone H3] + 2 O2 = 2 CO2 + 2 formaldehyde + L-lysyl36-[histone H3] + 2 succinate, 2 2-oxoglutarate + N6,N6-dimethyl-L-lysyl9-[histone H3] + 2 O2 = 2 CO2 + 2 formaldehyde + L-lysyl9-[histone H3] + 2 succinate	Fe	2-OG	His283, Asp285, His355
Dioxygenase	2-OG dependent dioxygenase	O75151	PHF2	PHF2 CENP-35 KIAA0662	Lysine-specific demethylase PHF2 (EC 1.14.11.-) (GRC5) (PHD finger protein 2)	2-oxoglutarate + N6,N6-dimethyl-L-lysyl9-[histone H3] + O2 = CO2 + formaldehyde + N6-methyl-L-lysyl9-[histone H3] + succinate	Fe	2-OG	His249, Asp251, Tyr321
Dioxygenase	2-OG dependent dioxygenase	Q8N371	KDM8	KDM8 JMJD5	Bifunctional peptidase and arginyl-hydroxylase JMJD5 (EC 1.14.11.-) (EC 3.4.-.-) (JmjC domain-containing protein 5) (Jumonji C domain-containing protein 5) (L-arginine (3R)-hydroxylase KDM8)	2-oxoglutarate + L-arginyl-[protein] + O2 = (3R)-3-hydroxy-L-arginyl-[protein] + CO2 + succinate	Fe	2-OG	His321, Asp323, His400
Dioxygenase	2-OG dependent dioxygenase	Q6NYC1	JMJD6	JMJD6 KIAA0585 PSR PTDSR	Bifunctional arginine demethylase and lysyl-hydroxylase JMJD6 (EC 1.14.11.-) (Histone arginine demethylase JMJD6) (JmjC domain-containing protein 6) (Jumonji domain-containing protein 6) (Lysyl-hydroxylase JMJD6) (Peptide-lysine 5-dioxygenase JMJD6) (Phosphatidylserine receptor) (Protein PTDSR)	2-oxoglutarate + L-lysyl-[protein] + O2 = (5S)-5-hydroxy-L-lysyl-[protein] + CO2 + succinate	Fe	2-OG	His187, Asp189, His273
Dioxygenase	2-OG dependent dioxygenase	P0C870	JMJD7	JMJD7	Bifunctional peptidase and (3S)-lysyl hydroxylase JMJD7 (EC 1.14.11.63) (EC 3.4.-.-) (JmjC domain-containing protein 7) (Jumonji domain-containing protein 7) (L-lysine (3S)-hydroxylase JMJD7)	2-oxoglutarate + L-lysyl-[protein] + O2 = (3S)-3-hydroxy-L-lysyl-[protein] + CO2 + succinate	Fe	2-OG	His178, Asp180, His277
Dioxygenase	2-OG dependent dioxygenase	Q9H9V9	JMJD4	JMJD4	2-oxoglutarate and iron-dependent oxygenase JMJD4 (EC 1.14.11.-) (JmjC domain-containing protein 4) (Jumonji domain-containing protein 4) (Lysyl-hydroxylase JMJD4)	2-oxoglutarate + L-lysyl-[protein] + O2 = 4-hydroxy-L-lysyl-[protein] + CO2 + succinate	Fe	2-OG	His235, Asp237, His315
Dioxygenase	2-OG dependent dioxygenase	Q8NFU7	TET1	TET1 CXXC6 KIAA1676 LCX	Methylcytosine dioxygenase TET1 (EC 1.14.11.n2) (CXXC-type zinc finger protein 6) (Leukemia-associated protein with a CXXC domain) (Ten-eleven translocation 1 gene protein)	2-oxoglutarate + a 5-methyl-2'-deoxycytidine in DNA + O2 = a 5-hydroxymethyl-2'-deoxycytidine in DNA + CO2 + succinate	Fe	2-OG	His1672, Asp1674, His2028	Discussed in section 'Epigenetic modulators'
Dioxygenase	2-OG dependent dioxygenase	Q6N021	TET2	TET2 KIAA1546 Nbla00191	Methylcytosine dioxygenase TET2 (EC 1.14.11.n2)	2-oxoglutarate + a 5-methyl-2'-deoxycytidine in DNA + O2 = a 5-hydroxymethyl-2'-deoxycytidine in DNA + CO2 + succinate	Fe	2-OG	His1382, Asp1384, His1881	Discussed in section 'Epigenetic modulators'
Dioxygenase	2-OG dependent dioxygenase	O43151	TET3	TET3 KIAA0401	Methylcytosine dioxygenase TET3 (EC 1.14.11.n2)	2-oxoglutarate + a 5-methyl-2'-deoxycytidine in DNA + O2 = a 5-hydroxymethyl-2'-deoxycytidine in DNA + CO2 + succinate	Fe	2-OG	His1085, Asp1087, His1681	Discussed in section 'Epigenetic modulators'
Dioxygenase	2-OG dependent dioxygenase	Q9C0B1	FTO	FTO KIAA1752	Alpha-ketoglutarate-dependent dioxygenase FTO (Fat mass and obesity-associated protein) (U6 small nuclear RNA (2'-O-methyladenosine-N(6)-)-demethylase FTO) (EC 1.14.11.-) (U6 small nuclear RNA N(6)-methyladenosine-demethylase FTO) (EC 1.14.11.-) (mRNA (2'-O-methyladenosine-N(6)-)-demethylase FTO) (m6A(m)-demethylase FTO) (EC 1.14.11.-) (mRNA N(6)-methyladenosine demethylase FTO) (EC 1.14.11.53) (…	2-oxoglutarate + a 5'-end (N7-methyl 5'-triphosphoguanosine)-(N6,2'-O-dimethyladenosine) in mRNA + O2 = a 5'-end (N7-methyl 5'-triphosphoguanosine)-(2'-O-methyladenosine) in mRNA + CO2 + formaldehyde + succinate	Fe	2-OG	His231, Asp233, His307	Discussed in section 'Translational modulators'
Dioxygenase	2-OG dependent dioxygenase	Q6P6C2	ALKBH5	ALKBH5 ABH5 OFOXD1	RNA demethylase ALKBH5 (EC 1.14.11.53) (Alkylated DNA repair protein alkB homolog 5) (Alpha-ketoglutarate-dependent dioxygenase alkB homolog 5)	2-oxoglutarate + N6-methyladenosine in mRNA + O2 = adenosine in mRNA + CO2 + formaldehyde + succinate	Fe	2-OG	His204, Asp206, His266	Discussed in section 'Translational modulators'
Dioxygenase	2-OG dependent dioxygenase	Q13686	ALKBH1	ALKBH1 ABH ABH1 ALKBH	Nucleic acid dioxygenase ALKBH1 (EC 1.14.11.-) (Alkylated DNA repair protein alkB homolog 1) (Alpha-ketoglutarate-dependent dioxygenase ABH1) (DNA 6mA demethylase) (DNA N6-methyl adenine demethylase ALKBH1) (EC 1.14.11.51) (DNA lyase ABH1) (EC 4.2.99.18) (DNA oxidative demethylase ALKBH1) (EC 1.14.11.33) (mRNA N(3)-methylcytidine demethylase) (EC 1.14.11.-)	2-oxoglutarate + an N6-methyl-2'-deoxyadenosine in DNA + O2 = a 2'-deoxyadenosine in DNA + CO2 + formaldehyde + succinate	Fe	2-OG	His231, Asp233, His287
Dioxygenase	2-OG dependent dioxygenase	Q6NS38	ALKBH2	ALKBH2 ABH2	DNA oxidative demethylase ALKBH2 (EC 1.14.11.33) (Alkylated DNA repair protein alkB homolog 2) (Alpha-ketoglutarate-dependent dioxygenase alkB homolog 2) (Oxy DC1)	2-oxoglutarate + a methylated nucleobase within DNA + O2 = a nucleobase within DNA + CO2 + formaldehyde + succinate	Fe	2-OG	His171, Asp173, His236
Dioxygenase	2-OG dependent dioxygenase	Q96Q83	ALKBH3	ALKBH3 ABH3 DEPC1	Alpha-ketoglutarate-dependent dioxygenase alkB homolog 3 (EC 1.14.11.54) (Alkylated DNA repair protein alkB homolog 3) (hABH3) (DEPC-1) (Prostate cancer antigen 1)	2-oxoglutarate + N1-methyladenosine in mRNA + O2 = adenosine in mRNA + CO2 + formaldehyde + succinate	Fe	2-OG	His191, Asp193, His257
Dioxygenase	2-OG dependent dioxygenase	Q9BT30	ALKBH7	ALKBH7 ABH7 SPATA11 UNQ6002/PRO34564	Alpha-ketoglutarate-dependent dioxygenase alkB homolog 7, mitochondrial (EC 1.14.11.-) (Alkylated DNA repair protein alkB homolog 7) (Spermatogenesis cell proliferation-related protein) (Spermatogenesis-associated protein 11)	May function as protein hydroxylase; can catalyze auto-hydroxylation at Leu-110 (in vitro), but this activity may be due to the absence of the true substrate	Fe	2-OG	His121, Asp123, His177
Dioxygenase	2-OG dependent dioxygenase	Q96BT7	ALKBH8	ALKBH8 ABH8	Alkylated DNA repair protein alkB homolog 8 (EC 1.14.11.-) (Probable alpha-ketoglutarate-dependent dioxygenase ABH8) (S-adenosyl-L-methionine-dependent tRNA methyltransferase ABH8) (tRNA (carboxymethyluridine(34)-5-O)-methyltransferase ABH8) (EC 2.1.1.229)	2-oxoglutarate-dependent dioxygenase activity	Fe	2-OG	His238, Asp240, His292
Dioxygenase	2-OG dependent dioxygenase	Q9NXW9	ALKBH4	ALKBH4 ABH4	Alpha-ketoglutarate-dependent dioxygenase alkB homolog 4 (Alkylated DNA repair protein alkB homolog 4) (DNA N6-methyl adenine demethylase ALKBH4) (EC 1.14.11.51) (Lysine-specific demethylase ALKBH4) (EC 1.14.11.-)	2-oxoglutarate + N6-methyl-L-lysyl-[protein] + O2 = CO2 + formaldehyde + L-lysyl-[protein] + succinate	Fe	2-OG	His169, Asp171, His254
Dioxygenase	2-OG dependent dioxygenase	Q8N543	OGFOD1	OGFOD1 KIAA1612 TPA1	Prolyl 3-hydroxylase OGFOD1 (EC 1.14.11.-) (2-oxoglutarate and iron-dependent oxygenase domain-containing protein 1) (Termination and polyadenylation 1 homolog) (uS12 prolyl 3-hydroxylase)	2-oxoglutarate + [ribosomal protein uS12]-L-proline + O2 = [ribosomal protein uS12]-(3S)-3-hydroxy-L-proline + CO2 + succinate	Fe	2-OG	His155, Asp157, His218	Discussed in section 'Translational modulators'
Dioxygenase	2-OG dependent dioxygenase	Q9H6W3	RIOX1	RIOX1 C14orf169 MAPJD NO66	Ribosomal oxygenase 1 (60S ribosomal protein L8 histidine hydroxylase) (Bifunctional lysine-specific demethylase and histidyl-hydroxylase NO66) (EC 1.14.11.-) (EC 1.14.11.27) (Histone lysine demethylase NO66) (Myc-associated protein with JmjC domain) (Nucleolar protein 66) (hsNO66) (Ribosomal oxygenase NO66) (ROX)	2 2-oxoglutarate + N6,N6-dimethyl-L-lysyl36-[histone H3] + 2 O2 = 2 CO2 + 2 formaldehyde + L-lysyl36-[histone H3] + 2 succinate	Fe	2-OG	His340, Asp342, His405	Discussed in section 'Translational modulators'
Dioxygenase	2-OG dependent dioxygenase	Q8IUF8	RIOX2	RIOX2 MDIG MINA MINA53 NO52	Ribosomal oxygenase 2 (60S ribosomal protein L27a histidine hydroxylase) (Bifunctional lysine-specific demethylase and histidyl-hydroxylase MINA) (EC 1.14.11.-) (Histone lysine demethylase MINA) (MYC-induced nuclear antigen) (Mineral dust-induced gene protein) (Nucleolar protein 52) (Ribosomal oxygenase MINA) (ROX)	2-oxoglutarate + L-histidyl-[ribosomal protein uL15] + O2 = (3S)-3-hydroxy-L-histidyl-[ribosomal protein uL15] + CO2 + succinate	Fe	2-OG	His179, Asp181, His240	Discussed in section 'Translational modulators'
Dioxygenase	2-OG dependent dioxygenase	Q9NVH6	TMLHE	TMLHE TMLH	Trimethyllysine dioxygenase, mitochondrial (EC 1.14.11.8) (Epsilon-trimethyllysine 2-oxoglutarate dioxygenase) (Epsilon-trimethyllysine hydroxylase) (TML hydroxylase) (TML-alpha-ketoglutarate dioxygenase) (TML dioxygenase) (TMLD)	2-oxoglutarate + N6,N6,N6-trimethyl-L-lysine + O2 = (3S)-3-hydroxy-N6,N6,N6-trimethyl-L-lysine + CO2 + succinate	Fe	2-OG	His242, Asp244, His389
Dioxygenase	2-OG dependent dioxygenase	Q9NXG6	P4HTM	P4HTM PH4	Transmembrane prolyl 4-hydroxylase (P4H-TM) (EC 1.14.11.29) (Hypoxia-inducible factor prolyl hydroxylase 4) (HIF-PH4) (HIF-prolyl hydroxylase 4) (HPH-4)	2-oxoglutarate + [hypoxia-inducible factor α subunit]-L-proline + O2 = [hypoxia-inducible factor α subunit]-trans-4-hydroxy-L-proline + CO2 + succinate	Fe	2-OG	His328, Asp330, Glu374
Dioxygenase	2-OG dependent dioxygenase	Q32P28	P3H1	P3H1 GROS1 LEPRE1 PSEC0109	Prolyl 3-hydroxylase 1 (EC 1.14.11.7) (Growth suppressor 1) (Leucine- and proline-enriched proteoglycan 1) (Leprecan-1)	2-oxoglutarate + L-prolyl-[procollagen] + O2 = CO2 + succinate + trans-3-hydroxy-L-prolyl-[procollagen]	Fe	2-OG	His587, Asp589, His659
Dioxygenase	2-OG dependent dioxygenase	Q8IVL5	P3H2	P3H2 LEPREL1 MLAT4	Prolyl 3-hydroxylase 2 (EC 1.14.11.7) (Leprecan-like protein 1) (Myxoid liposarcoma-associated protein 4)	2-oxoglutarate + L-prolyl-[procollagen] + O2 = CO2 + succinate + trans-3-hydroxy-L-prolyl-[procollagen]	Fe	2-OG	His580, Asp582, His652
Dioxygenase	2-OG dependent dioxygenase	Q8IVL6	P3H3	P3H3 LEPREL2	Prolyl 3-hydroxylase 3 (EC 1.14.11.7) (Leprecan-like protein 2) (Protein B)	2-oxoglutarate + L-prolyl-[procollagen] + O2 = CO2 + succinate + trans-3-hydroxy-L-prolyl-[procollagen]	Fe	2-OG	His584, Asp586, His656
Dioxygenase	2-OG dependent dioxygenase	P13674	P4HA1	P4HA1 P4HA	Prolyl 4-hydroxylase subunit alpha-1 (4-PH alpha-1) (EC 1.14.11.2) (Procollagen-proline,2-oxoglutarate-4-dioxygenase subunit alpha-1)	2-oxoglutarate + L-prolyl-[procollagen] + O2 = CO2 + succinate + trans-4-hydroxy-L-prolyl-[procollagen]	Fe	2-OG	His429, Asp431, His500
Dioxygenase	2-OG dependent dioxygenase	O15460	P4HA2	P4HA2 UNQ290/PRO330	Prolyl 4-hydroxylase subunit alpha-2 (4-PH alpha-2) (EC 1.14.11.2) (Procollagen-proline,2-oxoglutarate-4-dioxygenase subunit alpha-2)	2-oxoglutarate + L-prolyl-[procollagen] + O2 = CO2 + succinate + trans-4-hydroxy-L-prolyl-[procollagen]	Fe	2-OG	His430, Asp432, His501
Dioxygenase	2-OG dependent dioxygenase	Q7Z4N8	P4HA3	P4HA3 UNQ711/PRO1374	Prolyl 4-hydroxylase subunit alpha-3 (4-PH alpha-3) (EC 1.14.11.2) (Procollagen-proline,2-oxoglutarate-4-dioxygenase subunit alpha-3)	2-oxoglutarate + L-prolyl-[procollagen] + O2 = CO2 + succinate + trans-4-hydroxy-L-prolyl-[procollagen]	Fe	2-OG	His440, Asp442, His510
Dioxygenase	2-OG dependent dioxygenase	Q02809	PLOD1	PLOD1 LLH PLOD	Procollagen-lysine,2-oxoglutarate 5-dioxygenase 1 (EC 1.14.11.4) (Lysyl hydroxylase 1) (LH1)	2-oxoglutarate + L-lysyl-[procollagen] + O2 = (5R)-5-hydroxy-L-lysyl-[procollagen] + CO2 + succinate	Fe	2-OG	His656, Asp658, His708
Dioxygenase	2-OG dependent dioxygenase	O00469	PLOD2	PLOD2	Procollagen-lysine,2-oxoglutarate 5-dioxygenase 2 (EC 1.14.11.4) (Lysyl hydroxylase 2) (LH2)	2-oxoglutarate + L-lysyl-[procollagen] + O2 = (5R)-5-hydroxy-L-lysyl-[procollagen] + CO2 + succinate	Fe	2-OG	His666, Asp668, His718
Dioxygenase	2-OG dependent dioxygenase	O60568	PLOD3	PLOD3	Multifunctional procollagen lysine hydroxylase and glycosyltransferase LH3 [Includes: Procollagen-lysine,2-oxoglutarate 5-dioxygenase 3 (EC 1.14.11.4) (Lysyl hydroxylase 3) (LH3); Procollagen glycosyltransferase (EC 2.4.1.50) (EC 2.4.1.66) (Galactosylhydroxylysine-glucosyltransferase) (Procollagen galactosyltransferase) (Procollagen glucosyltransferase)]	2-oxoglutarate + L-lysyl-[procollagen] + O2 = (5R)-5-hydroxy-L-lysyl-[procollagen] + CO2 + succinate	Fe	2-OG	His667, Asp669, His719
Dioxygenase	2-OG dependent dioxygenase	O14832	PHYH	PHYH PAHX	Phytanoyl-CoA dioxygenase, peroxisomal (EC 1.14.11.18) (Phytanic acid oxidase) (Phytanoyl-CoA alpha-hydroxylase) (PhyH)	2-oxoglutarate + O2 + phytanoyl-CoA = 2-hydroxyphytanoyl-CoA + CO2 + succinate	Fe	2-OG	His175, Asp177, His264
Dioxygenase	2-OG dependent dioxygenase	Q5SRE7	PHYHD1	PHYHD1	Phytanoyl-CoA dioxygenase domain-containing protein 1 (EC 1.-.-.-)	Isoform 1 has alpha-ketoglutarate-dependent dioxygenase activity	Fe	2-OG	His156, Asp158, His246
Dioxygenase	2-OG dependent dioxygenase	A2RUC4	TYW5	TYW5 C2orf60	tRNA wybutosine-synthesizing protein 5 (hTYW5) (EC 1.14.11.42) (tRNA(Phe) (7-(3-amino-3-carboxypropyl)wyosine(37)-C(2))-hydroxylase)	2-oxoglutarate + 7-[(3S)-3-amino-3-carboxypropyl]wyosine37 in tRNAPhe + O2 = 7-(2-hydroxy-3-amino-3-carboxypropyl)wyosine37 in tRNAPhe + CO2 + succinate	Fe	2-OG	His160, Asp162, His235
Dioxygenase	2-OG dependent dioxygenase	Q12797	ASPH	ASPH BAH	Aspartyl/asparaginyl beta-hydroxylase (EC 1.14.11.16) (Aspartate beta-hydroxylase) (ASP beta-hydroxylase) (Peptide-aspartate beta-dioxygenase)	2-oxoglutarate + L-aspartyl-[protein] + O2 = 3-hydroxy-L-aspartyl-[protein] + CO2 + succinate	Fe	2-OG	His679, His725
Dioxygenase	2-OG dependent dioxygenase	Q6ICH7	ASPHD2	ASPHD2	Aspartate beta-hydroxylase domain-containing protein 2 (EC 1.14.11.-)	May function as 2-oxoglutarate-dependent dioxygenase.	Fe	2-OG	His283, His328
Dioxygenase	2-OG dependent dioxygenase	O75936	BBOX1	BBOX1 BBH BBOX	Gamma-butyrobetaine dioxygenase (EC 1.14.11.1) (Gamma-butyrobetaine hydroxylase) (Gamma-BBH) (Gamma-butyrobetaine,2-oxoglutarate dioxygenase)	2-oxoglutarate + 4-(trimethylamino)butanoate + O2 = carnitine + CO2 + succinate	Fe	2-OG	His202, Asp204, His347
Dioxygenase	Heme-dependent dioxygenase	P14902	IDO1	IDO1 IDO INDO	Indoleamine 2,3-dioxygenase 1 (IDO-1) (EC 1.13.11.52) (Indoleamine-pyrrole 2,3-dioxygenase)	D-tryptophan + O2 = N-formyl-D-kynurenine, L-tryptophan + O2 = N-formyl-L-kynurenine	Fe	Heme	His346	Discussed in section 'Heme-dependent dioxygenases'
Dioxygenase	Heme-dependent dioxygenase	P48775	TDO2	TDO2 TDO	Tryptophan 2,3-dioxygenase (TDO) (EC 1.13.11.11) (Tryptamin 2,3-dioxygenase) (Tryptophan oxygenase) (TO) (TRPO) (Tryptophan pyrrolase) (Tryptophanase)	L-tryptophan + O2 = N-formyl-L-kynurenine	Fe	Heme	His328	Discussed in section 'Heme-dependent dioxygenases'
Dioxygenase	Heme-dependent dioxygenase	Q6ZQW0	IDO2	IDO2 INDOL1	Indoleamine 2,3-dioxygenase 2 (IDO-2) (EC 1.13.11.-) (Indoleamine 2,3-dioxygenase-like protein 1) (Indoleamine-pyrrole 2,3-dioxygenase-like protein 1)	L-tryptophan + O2 = N-formyl-L-kynurenine	Fe	Heme	His360	Discussed in section 'Heme-dependent dioxygenases'
Dioxygenase	Heme-dependent dioxygenase	P35354	PTGS2	PTGS2 COX2	Prostaglandin G/H synthase 2 (EC 1.14.99.1) (Cyclooxygenase-2) (COX-2) (PHS II) (Prostaglandin H2 synthase 2) (PGH synthase 2) (PGHS-2) (Prostaglandin-endoperoxide synthase 2)	(5Z,8Z,11Z,14Z)-eicosatetraenoate + AH2 + 2 O2 = A + H2O + prostaglandin H2	Fe	Heme	His374
Dioxygenase	Heme-dependent dioxygenase	P23219	PTGS1	PTGS1 COX1	Prostaglandin G/H synthase 1 (EC 1.14.99.1) (Cyclooxygenase-1) (COX-1) (Prostaglandin H2 synthase 1) (PGH synthase 1) (PGHS-1) (PHS 1) (Prostaglandin-endoperoxide synthase 1)	(5Z,8Z,11Z,14Z)-eicosatetraenoate + AH2 + 2 O2 = A + H2O + prostaglandin H2	Fe	Heme	His387
Dioxygenase	Lipoxygenase	O15296	ALOX15B	ALOX15B	Arachidonate 15-lipoxygenase B (15-LOX-B) (EC 1.13.11.33) (15-lipoxygenase 2) (15-LOX-2) (Arachidonate 15-lipoxygenase type II) (Linoleate 13-lipoxygenase 15-LOb) (EC 1.13.11.-)	(5Z,8Z,11Z,14Z)-eicosatetraenoate + O2 = (15S)-hydroperoxy-(5Z,8Z,11Z,13E)-eicosatetraenoate	Fe		His373, His378, His553, 676Ile
Dioxygenase	Lipoxygenase	P18054	ALOX12	ALOX12 12LO LOG12	Arachidonate 12-lipoxygenase, 12S-type (12S-LOX) (12S-lipoxygenase) (EC 1.13.11.31) (Arachidonate 15-lipoxygenase,15S-type) (EC 1.13.11.33) (Linoleate 13S-lipoxygenase) (EC 1.13.11.12) (Lipoxin synthase 12-LO) (EC 3.3.2.-) (Platelet-type lipoxygenase 12)	(5Z,8Z,11Z,14Z)-eicosatetraenoate + O2 = (12S)-hydroperoxy-(5Z,8Z,10E,14Z)-eicosatetraenoate	Fe		His360, His365, His540, 544Asa, 663Ile	Discussed in section 'Lipoxygenases'
Dioxygenase	Lipoxygenase	O75342	ALOX12B	ALOX12B	Arachidonate 12-lipoxygenase, 12R-type (12R-LOX) (12R-lipoxygenase) (EC 1.13.11.-) (Epidermis-type lipoxygenase 12)	(5Z,8Z,11Z,14Z)-eicosatetraenoate + O2 = (12R)-hydroperoxy-(5Z,8Z,10E,14Z)-eicosatetraenoate	Fe		His398, His403, His578, Asn582, Ile701
Dioxygenase	Lipoxygenase	P16050	ALOX15	ALOX15 LOG15	Arachidonate 15-lipoxygenase (15-LOX) (15-LOX-1) (EC 1.13.11.33) (12/15-lipoxygenase) (Arachidonate 12-lipoxygenase, leukocyte-type) (12-LOX) (EC 1.13.11.31) (Arachidonate omega-6 lipoxygenase)	(5Z,8Z,11Z,14Z)-eicosatetraenoate + O2 = (12S)-hydroperoxy-(5Z,8Z,10E,14Z)-eicosatetraenoate, (5Z,8Z,11Z,14Z)-eicosatetraenoate + O2 = (15S)-hydroperoxy-(5Z,8Z,11Z,13E)-eicosatetraenoate	Fe		His360, His365, His540, His544, 662Ile	Discussed in section 'Lipoxygenases'
Dioxygenase	Lipoxygenase	P09917	ALOX5	ALOX5 LOG5	Arachidonate 5-lipoxygenase (5-LO) (5-lipoxygenase) (EC 1.13.11.34)	(5Z,8Z,11Z,14Z)-eicosatetraenoate + O2 = H2O + leukotriene A4	Fe		His368, His373, His551, Asn555, Ile674	Discussed in section 'Lipoxygenases'
Dioxygenase	Lipoxygenase	Q9BYJ1	ALOXE3	ALOXE3	Hydroperoxide isomerase ALOXE3 (EC 5.4.4.7) (Epidermis-type lipoxygenase 3) (Epidermal LOX-3) (e-LOX-3) (eLOX-3) (Hydroperoxy icosatetraenoate dehydratase) (EC 4.2.1.152)	n presence of oxygen, oxygenates polyunsaturated fatty acids, including arachidonic acid, to produce fatty acid hydroperoxides.	Fe		His408, His413, His588, Asn592, Ile711
Dioxygenase		Q16878	CDO1	CDO1	Cysteine dioxygenase type 1 (EC 1.13.11.20) (Cysteine dioxygenase type I) (CDO) (CDO-I)	L-cysteine + O2 = 3-sulfino-L-alanine + H+	Fe	L-cysteine	His86, His88, His140
Dioxygenase		Q96SZ5	ADO	ADO C10orf22	2-aminoethanethiol dioxygenase (EC 1.13.11.19) (Cysteamine dioxygenase)	cysteamine + O2 = H+ + hypotaurine	Fe
Dioxygenase		Q9BV57	ADI1	ADI1 MTCBP1 HMFT1638	1,2-dihydroxy-3-keto-5-methylthiopentene dioxygenase (EC 1.13.11.54) (Acireductone dioxygenase (Fe(2+)-requiring)) (ARD) (Fe-ARD) (Membrane-type 1 matrix metalloproteinase cytoplasmic tail-binding protein 1) (MTCBP-1) (Submergence-induced protein-like factor) (Sip-L)	1,2-dihydroxy-5-(methylsulfanyl)pent-1-en-3-one + O2 = 4-methylsulfanyl-2-oxobutanoate + formate + 2 H+	Fe	1,2-dihydroxy-5-(methylsulfanyl)pent-1-en-3-one	His88, His90, Glu94, His133
Dioxygenase		O00625	PIR	PIR	Pirin (EC 1.13.11.24) (Probable quercetin 2,3-dioxygenase PIR) (Probable quercetinase)	O2 + quercetin = 2-(3,4-dihydroxybenzoyloxy)-4,6-dihydroxybenzoate + CO	Fe	quercetin	His56, His58, His101, Glu103
Dioxygenase		P46952	HAAO	HAAO	3-hydroxyanthranilate 3,4-dioxygenase (EC 1.13.11.6) (3-hydroxyanthranilate oxygenase) (3-HAO) (h3HAO) (3-hydroxyanthranilic acid dioxygenase) (HAD)	3-hydroxyanthranilate + O2 = (2Z,4Z)-2-amino-3-carboxymuconate 6-semialdehyde	Fe		His47, Glu53, His91
Dioxygenase		O95571	ETHE1	ETHE1 HSCO	Persulfide dioxygenase ETHE1, mitochondrial (EC 1.13.11.18) (Ethylmalonic encephalopathy protein 1) (Hepatoma subtracted clone one protein) (Sulfur dioxygenase ETHE1)	H2O + O2 + S-sulfanylglutathione = glutathione + 2 H+ + sulfite	Fe	S-sulfanylglutathione	His79, His135, Asp154	Discussed in section 'Other dioxygenases'
Dioxygenase		P32754	HPD	HPD PPD	4-hydroxyphenylpyruvate dioxygenase (EC 1.13.11.27) (4-hydroxyphenylpyruvic acid oxidase) (4HPPD) (HPD) (HPPDase)	3-(4-hydroxyphenyl)pyruvate + O2 = CO2 + homogentisate	Fe	3-(4-hydroxyphenyl)pyruvate	His183, His266, Glu349
Dioxygenase		Q9HAY6	BCO1	BCO1 BCDO BCDO1 BCMO1	Beta,beta-carotene 15,15'-dioxygenase (EC 1.13.11.63) (Beta-carotene dioxygenase 1) (Beta-carotene oxygenase 1)	all-trans-β-carotene + O2 = 2 all-trans-retinal	Fe		His172, His237, His308, His514
Dioxygenase		Q9BYV7	BCO2	BCO2 BCDO2	Beta,beta-carotene 9',10'-oxygenase (EC 1.13.11.71) (B-diox-II) (Beta-carotene dioxygenase 2)	all-trans-β-carotene + O2 = all-trans-10'-apo-β-carotenal + β-ionone	Fe		His226, His286, His357, His573
Dioxygenase		Q93099	HGD	HGD HGO	Homogentisate 1,2-dioxygenase (EC 1.13.11.5) (Homogentisate oxygenase) (Homogentisic acid oxidase) (Homogentisicase)	homogentisate + O2 = 4-maleylacetoacetate + H+	Fe		His335, Glu341, His371
Monooxygenase	Heme-dependent monooxygenase	Q9HBI6	CYP4F11	CYP4F11	Cytochrome P450 4F11 (CYPIVF11) (EC 1.14.14.1) (3-hydroxy fatty acids omega-hydroxylase CYP4F11) (Docosahexaenoic acid omega-hydroxylase) (EC 1.14.14.79) (Long-chain fatty acid omega-monooxygenase) (EC 1.14.14.80) (Phylloquinone omega-hydroxylase CYP4F11) (EC 1.14.14.78)	an organic molecule + O2 + reduced [NADPH—hemoprotein reductase] = an alcohol + H+ + H2O + oxidized [NADPH—hemoprotein reductase]	Fe	Heme	Glu328
Monooxygenase	Heme-dependent monooxygenase	Q02318	CYP27A1	CYP27A1 CYP27	Sterol 26-hydroxylase, mitochondrial (EC 1.14.15.15) (5-beta-cholestane-3-alpha,7-alpha,12-alpha-triol 26-hydroxylase) (Cytochrome P-450C27/25) (Cytochrome P450 27) (Sterol 27-hydroxylase) (Vitamin D(3) 25-hydroxylase)	5β-cholestane-3α,7α,12α-triol + 5 H+ + 3 O2 + 6 reduced [adrenodoxin] = (25R)-3α,7α,12α-trihydroxy-5β-cholestan-26-oate + 4 H2O + 6 oxidized [adrenodoxin]	Fe	Heme	Cys476
Monooxygenase	Heme-dependent monooxygenase	P11712	CYP2C9	CYP2C9 CYP2C10	Cytochrome P450 2C9 (EC 1.14.14.1) ((R)-limonene 6-monooxygenase) (EC 1.14.14.53) ((S)-limonene 6-monooxygenase) (EC 1.14.14.51) ((S)-limonene 7-monooxygenase) (EC 1.14.14.52) (CYPIIC9) (Cholesterol 25-hydroxylase) (Cytochrome P-450MP) (Cytochrome P450 MP-4) (Cytochrome P450 MP-8) (Cytochrome P450 PB-1) (S-mephenytoin 4-hydroxylase)	an organic molecule + O2 + reduced [NADPH—hemoprotein reductase] = an alcohol + H+ + H2O + oxidized [NADPH—hemoprotein reductase]	Fe	Heme	Cys435
Monooxygenase	Heme-dependent monooxygenase	P33260	CYP2C18	CYP2C18	Cytochrome P450 2C18 (EC 1.14.14.1) (CYPIIC18) (Cytochrome P450-6b/29c)	an organic molecule + O2 + reduced [NADPH—hemoprotein reductase] = an alcohol + H+ + H2O + oxidized [NADPH—hemoprotein reductase]	Fe	Heme	Cys435
Monooxygenase	Heme-dependent monooxygenase	P33261	CYP2C19	CYP2C19	Cytochrome P450 2C19 (EC 1.14.14.1) ((R)-limonene 6-monooxygenase) (EC 1.14.14.53) ((S)-limonene 6-monooxygenase) (EC 1.14.14.51) ((S)-limonene 7-monooxygenase) (EC 1.14.14.52) (CYPIIC17) (CYPIIC19) (Cytochrome P450-11A) (Cytochrome P450-254C) (Fenbendazole monooxygenase (4'-hydroxylating)) (EC 1.14.14.75) (Mephenytoin 4-hydroxylase)	an organic molecule + O2 + reduced [NADPH—hemoprotein reductase] = an alcohol + H+ + H2O + oxidized [NADPH—hemoprotein reductase]	Fe	Heme	Cys435
Monooxygenase	Heme-dependent monooxygenase	Q16696	CYP2A13	CYP2A13	Cytochrome P450 2A13 (EC 1.14.14.1) (CYPIIA13)	an organic molecule + O2 + reduced [NADPH—hemoprotein reductase] = an alcohol + H+ + H2O + oxidized [NADPH—hemoprotein reductase]	Fe	Heme	Cys439
Monooxygenase	Heme-dependent monooxygenase	P20813	CYP2B6	CYP2B6	Cytochrome P450 2B6 (EC 1.14.13.-) (1,4-cineole 2-exo-monooxygenase) (CYPIIB6) (Cytochrome P450 IIB1)	N-(5Z,8Z,11Z,14Z-eicosatetraenoyl)-ethanolamine + O2 + reduced [NADPH—hemoprotein reductase] = H+ + H2O + N-(14,15-epoxy-5Z,8Z,11Z-eicosatrienoyl)-ethanolamine + oxidized [NADPH—hemoprotein reductase]	Fe	Heme	Cys436
Monooxygenase	Heme-dependent monooxygenase	P20853	CYP2A7	CYP2A7	Cytochrome P450 2A7 (EC 1.14.14.1) (CYPIIA7) (Cytochrome P450 IIA4)	an organic molecule + O2 + reduced [NADPH—hemoprotein reductase] = an alcohol + H+ + H2O + oxidized [NADPH—hemoprotein reductase]	Fe	Heme	Cys439
Monooxygenase	Heme-dependent monooxygenase	P05093	CYP17A1	CYP17A1 CYP17 S17AH	Steroid 17-alpha-hydroxylase/17,20 lyase (EC 1.14.14.19) (17-alpha-hydroxyprogesterone aldolase) (EC 1.14.14.32) (CYPXVII) (Cytochrome P450 17A1) (Cytochrome P450-C17) (Cytochrome P450c17) (Steroid 17-alpha-monooxygenase)	O2 + progesterone + reduced [NADPH—hemoprotein reductase] = 17α-hydroxyprogesterone + H+ + H2O + oxidized [NADPH—hemoprotein reductase]	Fe	Heme	Cys442
Monooxygenase	Heme-dependent monooxygenase	P11511	CYP19A1	CYP19A1 ARO1 CYAR CYP19	Aromatase (EC 1.14.14.14) (CYPXIX) (Cytochrome P-450AROM) (Cytochrome P450 19A1) (Estrogen synthase)	3 O2 + 3 reduced [NADPH—hemoprotein reductase] + testosterone = 17β-estradiol + formate + 4 H+ + 4 H2O + 3 oxidized [NADPH—hemoprotein reductase]	Fe	Heme	Cys437
Monooxygenase	Heme-dependent monooxygenase	P10632	CYP2C8	CYP2C8	Cytochrome P450 2C8 (EC 1.14.14.1) (CYPIIC8) (Cytochrome P450 IIC2) (Cytochrome P450 MP-12) (Cytochrome P450 MP-20) (Cytochrome P450 form 1) (S-mephenytoin 4-hydroxylase)	an organic molecule + O2 + reduced [NADPH—hemoprotein reductase] = an alcohol + H+ + H2O + oxidized [NADPH—hemoprotein reductase]	Fe	Heme	Cys435
Monooxygenase	Heme-dependent monooxygenase	P11509	CYP2A6	CYP2A6 CYP2A3	Cytochrome P450 2A6 (EC 1.14.13.-) (1,4-cineole 2-exo-monooxygenase) (CYPIIA6) (Coumarin 7-hydroxylase) (Cytochrome P450 IIA3) (Cytochrome P450(I))	1,4-cineole + O2 + reduced [NADPH—hemoprotein reductase] = 2-exo-hydroxy-1,4-cineole + H+ + H2O + oxidized [NADPH—hemoprotein reductase]	Fe	Heme	Cys439
Monooxygenase	Heme-dependent monooxygenase	P24903	CYP2F1	CYP2F1	Cytochrome P450 2F1 (EC 1.14.14.1) (CYPIIF1)	an organic molecule + O2 + reduced [NADPH—hemoprotein reductase] = an alcohol + H+ + H2O + oxidized [NADPH—hemoprotein reductase]	Fe	Heme	Cys436
Monooxygenase	Heme-dependent monooxygenase	Q6V0L0	CYP26C1	CYP26C1	Cytochrome P450 26C1 (EC 1.14.-.-)	monooxygenase activity GO	Fe	Heme	Cys459
Monooxygenase	Heme-dependent monooxygenase	Q6UW02	CYP20A1	CYP20A1 UNQ667/PRO1301	Cytochrome P450 20A1 (EC 1.14.-.-)	monooxygenase activity GO	Fe	Heme	Cys409
Monooxygenase	Heme-dependent monooxygenase	Q9NR63	CYP26B1	CYP26B1 CYP26A2 P450RAI2	Cytochrome P450 26B1 (EC 1.14.13.-) (Cytochrome P450 26A2) (Cytochrome P450 retinoic acid-inactivating 2) (Cytochrome P450RAI-2) (Retinoic acid-metabolizing cytochrome)	all-trans-retinoate + O2 + reduced [NADPH—hemoprotein reductase] = all-trans-4-hydroxyretinoate + H+ + H2O + oxidized [NADPH—hemoprotein reductase]	Fe	Heme	Cys441
Monooxygenase	Heme-dependent monooxygenase	Q4G0S4	CYP27C1	CYP27C1	Cytochrome P450 27C1 (EC 1.14.19.53) (All-trans retinol 3,4-desaturase)	all-trans-retinol + 2 H+ + O2 + 2 reduced [adrenodoxin] = all-trans-3,4-didehydroretinol + 2 H2O + 2 oxidized [adrenodoxin]	Fe	Heme	Cys318
Monooxygenase	Heme-dependent monooxygenase	Q9HCS2	CYP4F12	CYP4F12 UNQ568/PRO1129	Cytochrome P450 4F12 (EC 1.14.14.1) (CYPIVF12)	an organic molecule + O2 + reduced [NADPH—hemoprotein reductase] = an alcohol + H+ + H2O + oxidized [NADPH—hemoprotein reductase]	Fe	Heme	Cys368
Monooxygenase	Heme-dependent monooxygenase	Q8N118	CYP4X1	CYP4X1 UNQ1929/PRO4404	Cytochrome P450 4X1 (EC 1.14.14.1) (CYPIVX1)	N-(5Z,8Z,11Z,14Z-eicosatetraenoyl)-ethanolamine + O2 + reduced [NADPH—hemoprotein reductase] = H+ + H2O + N-(14,15-epoxy-5Z,8Z,11Z-eicosatrienoyl)-ethanolamine + oxidized [NADPH—hemoprotein reductase]	Fe	Heme	Cys454
Monooxygenase	Heme-dependent monooxygenase	Q9Y6A2	CYP46A1	CYP46A1 CYP46	Cholesterol 24-hydroxylase (CH24H) (EC 1.14.14.25) (Cholesterol 24-monooxygenase) (Cholesterol 24S-hydroxylase) (Cytochrome P450 46A1)	cholesterol + O2 + reduced [NADPH—hemoprotein reductase] = (24S)-hydroxycholesterol + H+ + H2O + oxidized [NADPH—hemoprotein reductase]	Fe	Heme	Cys437
Monooxygenase	Heme-dependent monooxygenase	Q9HB55	CYP3A43	CYP3A43	Cytochrome P450 3A43 (EC 1.14.14.1)	an organic molecule + O2 + reduced [NADPH—hemoprotein reductase] = an alcohol + H+ + H2O + oxidized [NADPH—hemoprotein reductase]	Fe	Heme	Cys442
Monooxygenase	Heme-dependent monooxygenase	Q6NT55	CYP4F22	CYP4F22	Cytochrome P450 4F22 (EC 1.14.14.-)	O2 + reduced [NADPH—hemoprotein reductase] + triacontanoate = H+ + H2O + ω-hydroxy-triacontanoate + oxidized [NADPH—hemoprotein reductase]	Fe	Heme	Cys475
Monooxygenase	Heme-dependent monooxygenase	P04798	CYP1A1	CYP1A1	Cytochrome P450 1A1 (CYPIA1) (EC 1.14.14.1) (Cytochrome P450 form 6) (Cytochrome P450-C) (Cytochrome P450-P1) (Hydroperoxy icosatetraenoate dehydratase) (EC 4.2.1.152)	an organic molecule + O2 + reduced [NADPH—hemoprotein reductase] = an alcohol + H+ + H2O + oxidized [NADPH—hemoprotein reductase]	Fe	Heme	Cys457
Monooxygenase	Heme-dependent monooxygenase	P05181	CYP2E1	CYP2E1 CYP2E	Cytochrome P450 2E1 (EC 1.14.14.1) (4-nitrophenol 2-hydroxylase) (EC 1.14.13.n7) (CYPIIE1) (Cytochrome P450-J)	an organic molecule + O2 + reduced [NADPH—hemoprotein reductase] = an alcohol + H+ + H2O + oxidized [NADPH—hemoprotein reductase]	Fe	Heme	Cys437
Monooxygenase	Heme-dependent monooxygenase	P20815	CYP3A5	CYP3A5	Cytochrome P450 3A5 (EC 1.14.14.1) (CYPIIIA5) (Cytochrome P450-PCN3)	an organic molecule + O2 + reduced [NADPH—hemoprotein reductase] = an alcohol + H+ + H2O + oxidized [NADPH—hemoprotein reductase]	Fe	Heme	Cys441
Monooxygenase	Heme-dependent monooxygenase	P05108	CYP11A1	CYP11A1 CYP11A	Cholesterol side-chain cleavage enzyme, mitochondrial (EC 1.14.15.6) (CYPXIA1) (Cholesterol desmolase) (Cytochrome P450 11A1) (Cytochrome P450(scc))	cholesterol + 6 H+ + 3 O2 + 6 reduced [adrenodoxin] = 4-methylpentanal + 4 H2O + 6 oxidized [adrenodoxin] + pregnenolone	Fe	Heme	Cys462
Monooxygenase	Heme-dependent monooxygenase	P13584	CYP4B1	CYP4B1	Cytochrome P450 4B1 (EC 1.14.14.1) (CYPIVB1) (Cytochrome P450-HP)	an organic molecule + O2 + reduced [NADPH—hemoprotein reductase] = an alcohol + H+ + H2O + oxidized [NADPH—hemoprotein reductase]	Fe	Heme	Cys453
Monooxygenase	Heme-dependent monooxygenase	Q96SQ9	CYP2S1	CYP2S1 UNQ891/PRO1906	Cytochrome P450 2S1 (EC 1.14.14.-) (CYPIIS1) (Hydroperoxy icosatetraenoate dehydratase) (EC 4.2.1.152) (Thromboxane-A synthase) (EC 5.3.99.5)	all-trans-retinoate + O2 + reduced [NADPH—hemoprotein reductase] = all-trans-5,6-epoxyretinoate + H+ + H2O + oxidized [NADPH—hemoprotein reductase]	Fe	Heme	Cys440
Monooxygenase	Heme-dependent monooxygenase	Q16850	CYP51A1	CYP51A1 CYP51	Lanosterol 14-alpha demethylase (LDM) (EC 1.14.14.154) (CYPLI) (Cytochrome P450 51A1) (Cytochrome P450-14DM) (Cytochrome P45014DM) (Cytochrome P450LI) (Sterol 14-alpha demethylase)	a 14α-methyl steroid + 3 O2 + 3 reduced [NADPH—hemoprotein reductase] = a Δ14 steroid + formate + 4 H+ + 4 H2O + 3 oxidized [NADPH—hemoprotein reductase]	Fe	Heme	Cys449
Monooxygenase	Heme-dependent monooxygenase	Q5TCH4	CYP4A22	CYP4A22	Cytochrome P450 4A22 (CYPIVA22) (Fatty acid omega-hydroxylase) (Lauric acid omega-hydroxylase) (Long-chain fatty acid omega-monooxygenase) (EC 1.14.14.80)	an ω-methyl-long-chain fatty acid + O2 + reduced [NADPH—hemoprotein reductase] = an ω-hydroxy-long-chain fatty acid + H+ + H2O + oxidized [NADPH—hemoprotein reductase]	Fe	Heme	Cys457
Monooxygenase	Heme-dependent monooxygenase	P08686	CYP21A2	CYP21A2 CYP21 CYP21B	Steroid 21-hydroxylase (EC 1.14.14.16) (21-OHase) (Cytochrome P-450c21) (Cytochrome P450 21) (Cytochrome P450 XXI) (Cytochrome P450-C21) (Cytochrome P450-C21B)	A C(21) steroid + [reduced NADPH--hemoprotein reductase] + O(2) = a 21-hydroxy-C(21)-steroid + [oxidized NADPH--hemoprotein reductase] + H(2)O.	Fe	Heme	Cys428
Monooxygenase	Heme-dependent monooxygenase	Q86W10	CYP4Z1	CYP4Z1 UNQ3060/PRO9882	Cytochrome P450 4Z1 (EC 1.14.14.1) (CYPIVZ1)	an organic molecule + O2 + reduced [NADPH—hemoprotein reductase] = an alcohol + H+ + H2O + oxidized [NADPH—hemoprotein reductase]	Fe	Heme	Cys452
Monooxygenase	Heme-dependent monooxygenase	P08684	CYP3A4	CYP3A4 CYP3A3	Cytochrome P450 3A4 (EC 1.14.14.1) (1,8-cineole 2-exo-monooxygenase) (EC 1.14.14.56) (Albendazole monooxygenase (sulfoxide-forming)) (EC 1.14.14.73) (Albendazole sulfoxidase) (CYPIIIA3) (CYPIIIA4) (Cholesterol 25-hydroxylase) (Cytochrome P450 3A3) (Cytochrome P450 HLp) (Cytochrome P450 NF-25) (Cytochrome P450-PCN1) (Nifedipine oxidase) (Quinine 3-monooxygenase) (EC 1.14.14.55)	an organic molecule + O2 + reduced [NADPH—hemoprotein reductase] = an alcohol + H+ + H2O + oxidized [NADPH—hemoprotein reductase]	Fe	Heme	Cys442
Monooxygenase	Heme-dependent monooxygenase	Q07973	CYP24A1	CYP24A1 CYP24	1,25-dihydroxyvitamin D(3) 24-hydroxylase, mitochondrial (24-OHase) (Vitamin D(3) 24-hydroxylase) (EC 1.14.15.16) (Cytochrome P450 24A1) (Cytochrome P450-CC24)	calcitriol + 2 H+ + O2 + 2 reduced [adrenodoxin] = calcitetrol + H2O + 2 oxidized [adrenodoxin]	Fe	Heme	Cys462
Monooxygenase	Heme-dependent monooxygenase	P15538	CYP11B1	CYP11B1 S11BH	Cytochrome P450 11B1, mitochondrial (CYPXIB1) (Cytochrome P-450c11) (Cytochrome P450C11) (Steroid 11-beta-hydroxylase, CYP11B1) (EC 1.14.15.4)	a steroid + 2 H+ + O2 + 2 reduced [adrenodoxin] = an 11β-hydroxysteroid + H2O + 2 oxidized [adrenodoxin]	Fe	Heme	Cys450
Monooxygenase	Heme-dependent monooxygenase	Q16678	CYP1B1	CYP1B1	Cytochrome P450 1B1 (EC 1.14.14.1) (CYPIB1) (Hydroperoxy icosatetraenoate dehydratase) (EC 4.2.1.152)	an organic molecule + O2 + reduced [NADPH—hemoprotein reductase] = an alcohol + H+ + H2O + oxidized [NADPH—hemoprotein reductase]	Fe	Heme	Cys470
Monooxygenase	Heme-dependent monooxygenase	A0A087X1C5	CYP2D7	CYP2D7	Putative cytochrome P450 2D7 (EC 1.14.14.1)	an organic molecule + O2 + reduced [NADPH—hemoprotein reductase] = an alcohol + H+ + H2O + oxidized [NADPH—hemoprotein reductase]	Fe	Heme	Cys461
Monooxygenase	Heme-dependent monooxygenase	Q6ZWL3	CYP4V2	CYP4V2	Cytochrome P450 4V2 (EC 1.14.14.-) (Docosahexaenoic acid omega-hydroxylase CYP4V2) (EC 1.14.14.79)	(4Z,7Z,10Z,13Z,16Z,19Z)-docosahexaenoate + O2 + reduced [NADPH—hemoprotein reductase] = 22-hydroxy-(4Z,7Z,10Z,13Z,16Z,19Z)-docosahexaenoate + H+ + H2O + oxidized [NADPH—hemoprotein reductase]	Fe	Heme	Cys467
Monooxygenase	Heme-dependent monooxygenase	Q8TAV3	CYP2W1	CYP2W1	Cytochrome P450 2W1 (EC 1.14.14.-) (CYPIIW1)	all-trans-retinoate + O2 + reduced [NADPH—hemoprotein reductase] = all-trans-4-hydroxyretinoate + H+ + H2O + oxidized [NADPH—hemoprotein reductase]	Fe	Heme	Cys433
Monooxygenase	Heme-dependent monooxygenase	P10635	CYP2D6	CYP2D6 CYP2DL1	Cytochrome P450 2D6 (EC 1.14.14.-) (CYPIID6) (Cholesterol 25-hydroxylase) (Cytochrome P450-DB1) (Debrisoquine 4-hydroxylase)	(5Z,8Z,11Z,14Z)-eicosatetraenoate + O2 + reduced [NADPH—hemoprotein reductase] = (8R,9S)-epoxy-(5Z,11Z,14Z)-eicosatrienoate + H+ + H2O + oxidized [NADPH—hemoprotein reductase]	Fe	Heme	Cys443
Monooxygenase	Heme-dependent monooxygenase	O75881	CYP7B1	CYP7B1	Cytochrome P450 7B1 (24-hydroxycholesterol 7-alpha-hydroxylase) (EC 1.14.14.26) (25/26-hydroxycholesterol 7-alpha-hydroxylase) (EC 1.14.14.29) (3-hydroxysteroid 7-alpha hydroxylase) (Oxysterol 7-alpha-hydroxylase)	25-hydroxycholesterol + O2 + reduced [NADPH—hemoprotein reductase] = 7α,25-dihydroxycholesterol + H+ + H2O + oxidized [NADPH—hemoprotein reductase]	Fe	Heme	Cys449
Monooxygenase	Heme-dependent monooxygenase	Q02928	CYP4A11	CYP4A11 CYP4A2	Cytochrome P450 4A11 (EC 1.14.14.1) (20-hydroxyeicosatetraenoic acid synthase) (20-HETE synthase) (CYP4AII) (CYPIVA11) (Cytochrome P-450HK-omega) (Cytochrome P450HL-omega) (Fatty acid omega-hydroxylase) (Lauric acid omega-hydroxylase) (Long-chain fatty acid omega-monooxygenase) (EC 1.14.14.80)	an organic molecule + O2 + reduced [NADPH—hemoprotein reductase] = an alcohol + H+ + H2O + oxidized [NADPH—hemoprotein reductase]	Fe	Heme	Cys457
Monooxygenase	Heme-dependent monooxygenase	O15528	CYP27B1	CYP27B1 CYP1ALPHA CYP27B	25-hydroxyvitamin D-1 alpha hydroxylase, mitochondrial (EC 1.14.15.18) (25-OHD-1 alpha-hydroxylase) (25-hydroxyvitamin D(3) 1-alpha-hydroxylase) (VD3 1A hydroxylase) (Calcidiol 1-monooxygenase) (Cytochrome P450 subfamily XXVIIB polypeptide 1) (Cytochrome P450C1 alpha) (Cytochrome P450VD1-alpha) (Cytochrome p450 27B1)	calcidiol + 2 H+ + O2 + 2 reduced [adrenodoxin] = calcitriol + H2O + 2 oxidized [adrenodoxin]	Fe	Heme	Cys455
Monooxygenase	Heme-dependent monooxygenase	Q9UNU6	CYP8B1	CYP8B1 CYP12	7-alpha-hydroxycholest-4-en-3-one 12-alpha-hydroxylase (EC 1.14.18.8) (7-alpha-hydroxy-4-cholesten-3-one 12-alpha-hydroxylase) (CYPVIIIB1) (Cytochrome P450 8B1) (Sterol 12-alpha-hydroxylase)	7α-hydroxycholest-4-en-3-one + 2 [Fe(II)-cytochrome b5] + 2 H+ + O2 = 7α,12α-dihydroxycholest-4-en-3-one + 2 [Fe(III)-cytochrome b5] + H2O	Fe	Heme	Cys440
Monooxygenase	Heme-dependent monooxygenase	Q7Z449	CYP2U1	CYP2U1	Cytochrome P450 2U1 (EC 1.14.14.1)	an ω-methyl-long-chain fatty acid + O2 + reduced [NADPH—hemoprotein reductase] = an ω-hydroxy-long-chain fatty acid + H+ + H2O + oxidized [NADPH—hemoprotein reductase]	Fe	Heme	Cys490
Monooxygenase	Heme-dependent monooxygenase	P05177	CYP1A2	CYP1A2	Cytochrome P450 1A2 (EC 1.14.14.1) (CYPIA2) (Cholesterol 25-hydroxylase) (Cytochrome P(3)450) (Cytochrome P450 4) (Cytochrome P450-P3) (Hydroperoxy icosatetraenoate dehydratase) (EC 4.2.1.152)	an organic molecule + O2 + reduced [NADPH—hemoprotein reductase] = an alcohol + H+ + H2O + oxidized [NADPH—hemoprotein reductase]	Fe	Heme	Cys458
Monooxygenase	Heme-dependent monooxygenase	P98187	CYP4F8	CYP4F8	Cytochrome P450 4F8 (EC 1.14.14.1) (CYPIVF8)	an organic molecule + O2 + reduced [NADPH—hemoprotein reductase] = an alcohol + H+ + H2O + oxidized [NADPH—hemoprotein reductase]	Fe	Heme	Cys468
Monooxygenase	Heme-dependent monooxygenase	P22680	CYP7A1	CYP7A1 CYP7	Cytochrome P450 7A1 (24-hydroxycholesterol 7-alpha-hydroxylase) (EC 1.14.14.26) (CYPVII) (Cholesterol 7-alpha-hydroxylase) (Cholesterol 7-alpha-monooxygenase) (EC 1.14.14.23)		Fe	Heme	Cys440
Monooxygenase	Heme-dependent monooxygenase	Q9NYL5	CYP39A1	CYP39A1	24-hydroxycholesterol 7-alpha-hydroxylase (EC 1.14.14.26) (Cytochrome P450 39A1) (hCYP39A1) (Oxysterol 7-alpha-hydroxylase)	(24S)-hydroxycholesterol + O2 + reduced [NADPH—hemoprotein reductase] = (24S)-7α-dihydroxycholesterol + H+ + H2O + oxidized [NADPH—hemoprotein reductase]	Fe	Heme	Cys414
Monooxygenase	Heme-dependent monooxygenase	P24462	CYP3A7	CYP3A7	Cytochrome P450 3A7 (EC 1.14.14.1) (CYPIIIA7) (Cytochrome P450-HFLA) (P450HLp2)	an organic molecule + O2 + reduced [NADPH—hemoprotein reductase] = an alcohol + H+ + H2O + oxidized [NADPH—hemoprotein reductase]	Fe	Heme	Cys442
Monooxygenase	Heme-dependent monooxygenase	Q08477	CYP4F3	CYP4F3 LTB4H	Cytochrome P450 4F3 (EC 1.14.14.1) (20-hydroxyeicosatetraenoic acid synthase) (20-HETE synthase) (CYPIVF3) (Cytochrome P450-LTB-omega) (Docosahexaenoic acid omega-hydroxylase CYP4F3) (EC 1.14.14.79) (Leukotriene-B(4) 20-monooxygenase 2) (Leukotriene-B(4) omega-hydroxylase 2) (EC 1.14.14.94)	an organic molecule + O2 + reduced [NADPH—hemoprotein reductase] = an alcohol + H+ + H2O + oxidized [NADPH—hemoprotein reductase]	Fe	Heme	Cys468
Monooxygenase	Heme-dependent monooxygenase	Q6VVX0	CYP2R1	CYP2R1	Vitamin D 25-hydroxylase (EC 1.14.14.24) (Cytochrome P450 2R1)	calciol + O2 + reduced [NADPH—hemoprotein reductase] = calcidiol + H+ + H2O + oxidized [NADPH—hemoprotein reductase]	Fe	Heme	Cys448
Monooxygenase	Heme-dependent monooxygenase	P78329	CYP4F2	CYP4F2	Cytochrome P450 4F2 (EC 1.14.14.1) (20-hydroxyeicosatetraenoic acid synthase) (20-HETE synthase) (Arachidonic acid omega-hydroxylase) (CYPIVF2) (Cytochrome P450-LTB-omega) (Docosahexaenoic acid omega-hydroxylase) (EC 1.14.14.79) (Leukotriene-B(4) 20-monooxygenase 1) (Leukotriene-B(4) omega-hydroxylase 1) (EC 1.14.14.94) (Phylloquinone omega-hydroxylase CYP4F2) (EC 1.14.14.78)	an organic molecule + O2 + reduced [NADPH—hemoprotein reductase] = an alcohol + H+ + H2O + oxidized [NADPH—hemoprotein reductase]	Fe	Heme	Cys468
Monooxygenase	Heme-dependent monooxygenase	P51589	CYP2J2	CYP2J2	Cytochrome P450 2J2 (EC 1.14.14.-) (Albendazole monooxygenase (hydroxylating)) (EC 1.14.14.74) (Albendazole monooxygenase (sulfoxide-forming)) (EC 1.14.14.73) (Arachidonic acid epoxygenase) (CYPIIJ2) (Hydroperoxy icosatetraenoate isomerase) (EC 5.4.4.7)	(5Z,8Z,11Z,14Z)-eicosatetraenoate + O2 + reduced [NADPH—hemoprotein reductase] = 5,6-epoxy-(8Z,11Z,14Z)-eicosatrienoate + H+ + H2O + oxidized [NADPH—hemoprotein reductase]	Fe	Heme	Cys448
Monooxygenase	Heme-dependent monooxygenase	O43174	CYP26A1	CYP26A1 CYP26 P450RAI1	Cytochrome P450 26A1 (EC 1.14.13.-) (Cytochrome P450 retinoic acid-inactivating 1) (Cytochrome P450RAI) (hP450RAI) (Retinoic acid 4-hydroxylase) (Retinoic acid-metabolizing cytochrome)	all-trans-retinoate + O2 + reduced [NADPH—hemoprotein reductase] = all-trans-(4S)-hydroxyretinoate + H+ + H2O + oxidized [NADPH—hemoprotein reductase]	Fe	Heme	Cys442
Monooxygenase	Heme-dependent monooxygenase	P19099	CYP11B2	CYP11B2	Cytochrome P450 11B2, mitochondrial (Aldosterone synthase) (ALDOS) (Aldosterone-synthesizing enzyme) (CYPXIB2) (Corticosterone 18-monooxygenase, CYP11B2) (EC 1.14.15.5) (Cytochrome P-450Aldo) (Cytochrome P-450C18) (Steroid 11-beta-hydroxylase, CYP11B2) (EC 1.14.15.4) (Steroid 18-hydroxylase)	a steroid + 2 H+ + O2 + 2 reduced [adrenodoxin] = an 11β-hydroxysteroid + H2O + 2 oxidized [adrenodoxin]	Fe	Heme	Cys450
Monooxygenase	Heme-dependent monooxygenase	P09601	HMOX1	HMOX1 HO HO1	Heme oxygenase 1 (HO-1) (EC 1.14.14.18)	heme b + 3 O2 + 3 reduced [NADPH—hemoprotein reductase] = biliverdin IXα + CO + Fe2+ + H+ + 3 H2O + 3 oxidized [NADPH—hemoprotein reductase]	Fe	Heme	His25	Discussed in section 'Heme-dependent monooxygenases'
Monooxygenase	Heme-dependent monooxygenase	P30519	HMOX2	HMOX2 HO2	Heme oxygenase 2 (HO-2) (EC 1.14.14.18)	heme b + 3 O2 + 3 reduced [NADPH—hemoprotein reductase] = biliverdin IXα + CO + Fe2+ + H+ + 3 H2O + 3 oxidized [NADPH—hemoprotein reductase]	Fe	Heme	His45	Discussed in section 'Heme-dependent monooxygenases'
Monooxygenase	Heme-dependent monooxygenase	P35228	NOS2	NOS2 NOS2A	Nitric oxide synthase, inducible (EC 1.14.13.39) (Hepatocyte NOS) (HEP-NOS) (Inducible NO synthase) (Inducible NOS) (iNOS) (NOS type II) (Peptidyl-cysteine S-nitrosylase NOS2)	H+ + 2 L-arginine + 3 NADPH + 4 O2 = 4 H2O + 2 L-citrulline + 3 NADP+ + 2 nitric oxide	Fe	Heme	Cys200	Discussed in section 'Heme-dependent monooxygenases'
Monooxygenase	Heme-dependent monooxygenase	P29475	NOS1	NOS1	Nitric oxide synthase, brain (EC 1.14.13.39) (Constitutive NOS) (NC-NOS) (NOS type I) (Neuronal NOS) (N-NOS) (nNOS) (Peptidyl-cysteine S-nitrosylase NOS1) (bNOS)	H+ + 2 L-arginine + 3 NADPH + 4 O2 = 4 H2O + 2 L-citrulline + 3 NADP+ + 2 nitric oxide	Fe	Heme	Cys420	Discussed in section 'Heme-dependent monooxygenases'
Monooxygenase	Heme-dependent monooxygenase	P29474	NOS3	NOS3	Nitric oxide synthase, endothelial (EC 1.14.13.39) (Constitutive NOS) (cNOS) (EC-NOS) (Endothelial NOS) (eNOS) (NOS type III) (NOSIII)	H+ + 2 L-arginine + 3 NADPH + 4 O2 = 4 H2O + 2 L-citrulline + 3 NADP+ + 2 nitric oxide	Fe	Heme	Cys184	Discussed in section 'Heme-dependent monooxygenases'
Monooxygenase	Non-Heme Fe-dependent monooxygenase	P00439	PAH	PAH	Phenylalanine-4-hydroxylase (PAH) (EC 1.14.16.1) (Phe-4-monooxygenase)	(6R)-L-erythro-5,6,7,8-tetrahydrobiopterin + L-phenylalanine + O2 = (4aS,6R)-4a-hydroxy-L-erythro-5,6,7,8-tetrahydrobiopterin + L-tyrosine	Fe		His285, His290, Glu330	Discussed in section 'Non-heme Fe-dependent monooxygenases'
Monooxygenase	Non-Heme Fe-dependent monooxygenase	Q8IWU9	TPH2	TPH2 NTPH	Tryptophan 5-hydroxylase 2 (EC 1.14.16.4) (Neuronal tryptophan hydroxylase) (Tryptophan 5-monooxygenase 2)	(6R)-L-erythro-5,6,7,8-tetrahydrobiopterin + L-tryptophan + O2 = (4aS,6R)-4a-hydroxy-L-erythro-5,6,7,8-tetrahydrobiopterin + 5-hydroxy-L-tryptophan	Fe		His318, His323, Glu363	Discussed in section 'Non-heme Fe-dependent monooxygenases'
Monooxygenase	Non-Heme Fe-dependent monooxygenase	P07101	TH	TH TYH	Tyrosine 3-monooxygenase (EC 1.14.16.2) (Tyrosine 3-hydroxylase) (TH)	(6R)-L-erythro-5,6,7,8-tetrahydrobiopterin + L-tyrosine + O2 = (4aS,6R)-4a-hydroxy-L-erythro-5,6,7,8-tetrahydrobiopterin + L-dopa	Fe		His361, His366, Glu401	Discussed in section 'Non-heme Fe-dependent monooxygenases'
Monooxygenase	Non-Heme Fe-dependent monooxygenase	P17752	TPH1	TPH1 TPH TPRH TRPH	Tryptophan 5-hydroxylase 1 (EC 1.14.16.4) (Tryptophan 5-monooxygenase 1)	(6R)-L-erythro-5,6,7,8-tetrahydrobiopterin + L-tryptophan + O2 = (4aS,6R)-4a-hydroxy-L-erythro-5,6,7,8-tetrahydrobiopterin + 5-hydroxy-L-tryptophan	Fe		His272, His277, Glu317	Discussed in section 'Non-heme Fe-dependent monooxygenases'
Monooxygenase	Non-Heme Fe-dependent monooxygenase	Q6ZNB7	AGMO	AGMO TMEM195	Alkylglycerol monooxygenase (EC 1.14.16.5) (Transmembrane protein 195)	(6R)-L-erythro-5,6,7,8-tetrahydrobiopterin + 1-O-(1,2-saturated-alkyl)-sn-glycerol + O2 = (6R)-L-erythro-6,7-dihydrobiopterin + a 1-(1-hydroxyalkyl)-sn-glycerol + H2O	Fe
Monooxygenase	Non-Heme Fe-dependent monooxygenase	O95992	CH25H	CH25H	Cholesterol 25-hydroxylase (EC 1.14.99.38) (Cholesterol 25-monooxygenase) (h25OH)	AH2 + cholesterol + O2 = 25-hydroxycholesterol + A + H2O	Fe
Monooxygenase	Non-Heme Fe-dependent monooxygenase	Q15800	MSMO1	MSMO1 DESP4 ERG25 SC4MOL	Methylsterol monooxygenase 1 (EC 1.14.18.9) (C-4 methylsterol oxidase)	4,4-dimethyl-5α-cholest-7-en-3β-ol + 6 [Fe(II)-cytochrome b5] + 5 H+ + 3 O2 = 3β-hydroxy-4β-methyl-5α-cholest-7-ene-4α-carboxylate + 6 [Fe(III)-cytochrome b5] + 4 H2O	Fe
Monooxygenase	Non-Heme Fe-dependent monooxygenase	Q9UGB7	MIOX	MIOX ALDRL6 KSP32 RSOR	Inositol oxygenase (EC 1.13.99.1) (Aldehyde reductase-like 6) (Kidney-specific protein 32) (Myo-inositol oxygenase) (MI oxygenase) (Renal-specific oxidoreductase)	myo-inositol + O2 = D-glucuronate + H+ + H2O	Fe, Fe	myo-inositol	His98, Asp253,His123, Asp124; His220, His194, Asp124
Monooxygenase	Non-Heme Fe-dependent monooxygenase	Q9BU89	DOHH	DOHH HLRC1	Deoxyhypusine hydroxylase (hDOHH) (EC 1.14.99.29) (Deoxyhypusine dioxygenase) (Deoxyhypusine monooxygenase) (HEAT-like repeat-containing protein 1)		Fe, Fe		His56, His240, Glu241; His89, Glu90, His207
Monooxygenase	Cu-dependent monooxygenase	P09172	DBH	DBH	Dopamine beta-hydroxylase (EC 1.14.17.1) (Dopamine beta-monooxygenase) [Cleaved into: Soluble dopamine beta-hydroxylase]	dopamine + 2 L-ascorbate + O2 = (R)-noradrenaline + H2O + 2 monodehydro-L-ascorbate radical	Cu, Cu		His412, His 414, Met487; His262, His263, His333
Monooxygenase	Cu-dependent monooxygenase	A6NHM9	MOXD2P	MOXD2P MOXD2	Putative DBH-like monooxygenase protein 2 (EC 1.14.17.-) (DBH-like monooxygenase protein 2 pseudogene)		Cu, Cu		His389, His 391, Met464; His241, His242, His308
Monooxygenase	Cu-dependent monooxygenase	P14679	TYR	TYR	Tyrosinase (EC 1.14.18.1) (LB24-AB) (Monophenol monooxygenase) (SK29-AB) (Tumor rejection antigen AB)	2 L-dopa + O2 = 2 H2O + 2 L-dopaquinone	Cu, Cu		His180, His 202, His211; His363, His367, His390
Monooxygenase	Cu-dependent monooxygenase	Q6UVY6	MOXD1	MOXD1 MOX UNQ2493/PRO5780	DBH-like monooxygenase protein 1 (EC 1.14.17.-) (Monooxygenase X)		Cu, Cu		His235, His236, His307; His389, His391, Met464
Monooxygenase	Cu-dependent monooxygenase	P19021	PAM	PAM	Peptidyl-glycine alpha-amidating monooxygenase (PAM) [Includes: Peptidylglycine alpha-hydroxylating monooxygenase (PHM) (EC 1.14.17.3); Peptidyl-alpha-hydroxyglycine alpha-amidating lyase (EC 4.3.2.5) (Peptidylamidoglycolate lyase) (PAL)]	a [peptide]-C-terminal glycine + 2 L-ascorbate + O2 = a [peptide]-C-terminal (2S)-2-hydroxyglycine + H2O + 2 monodehydro-L-ascorbate radical	Cu, Cu		His102, His103, His167; His237, His239, Met309	Discussed in section 'Copper-dependent monooxygenases'
Monooxygenase	Flavin-dependent monooxygenase	Q01740	FMO1	FMO1	Dimethylaniline monooxygenase [N-oxide-forming] 1 (EC 1.14.13.8) (Dimethylaniline oxidase 1) (Fetal hepatic flavin-containing monooxygenase 1) (FMO 1)	H+ + N,N-dimethylaniline + NADPH + O2 = H2O + N,N-dimethylaniline N-oxide + NADP+		FAD
Monooxygenase	Flavin-dependent monooxygenase	Q99518	FMO2	FMO2	Dimethylaniline monooxygenase [N-oxide-forming] 2 (EC 1.14.13.8) (Dimethylaniline oxidase 2) (FMO 1B1) (Pulmonary flavin-containing monooxygenase 2) (FMO 2)	H+ + N,N-dimethylaniline + NADPH + O2 = H2O + N,N-dimethylaniline N-oxide + NADP+		FAD
Monooxygenase	Flavin-dependent monooxygenase	P31513	FMO3	FMO3	Dimethylaniline monooxygenase [N-oxide-forming] 3 (EC 1.14.13.8) (EC 1.14.14.73) (Dimethylaniline oxidase 3) (FMO II) (FMO form 2) (Hepatic flavin-containing monooxygenase 3) (FMO 3) (Trimethylamine monooxygenase) (EC 1.14.13.148)	H+ + N,N-dimethylaniline + NADPH + O2 = H2O + N,N-dimethylaniline N-oxide + NADP+		FAD
Monooxygenase	Flavin-dependent monooxygenase	P31512	FMO4	FMO4 FMO2	Dimethylaniline monooxygenase [N-oxide-forming] 4 (EC 1.14.13.8) (Dimethylaniline oxidase 4) (Hepatic flavin-containing monooxygenase 4) (FMO 4)	H+ + N,N-dimethylaniline + NADPH + O2 = H2O + N,N-dimethylaniline N-oxide + NADP+		FAD
Monooxygenase	Flavin-dependent monooxygenase	P49326	FMO5	FMO5	Dimethylaniline monooxygenase [N-oxide-forming] 5 (EC 1.14.13.8) (Dimethylaniline oxidase 5) (Hepatic flavin-containing monooxygenase 5) (FMO 5)	H+ + N,N-dimethylaniline + NADPH + O2 = H2O + N,N-dimethylaniline N-oxide + NADP+		FAD
Monooxygenase	Flavin-dependent monooxygenase	O60774	FMO6P	FMO6P FMO6	Putative dimethylaniline monooxygenase [N-oxide-forming] 6 (EC 1.14.13.8) (Dimethylaniline oxidase 6) (Flavin-containing monooxygenase 6) (FMO 6)	H+ + N,N-dimethylaniline + NADPH + O2 = H2O + N,N-dimethylaniline N-oxide + NADP+		FAD
Monooxygenase	Flavin-dependent monooxygenase	O15229	KMO	KMO	Kynurenine 3-monooxygenase (EC 1.14.13.9) (Kynurenine 3-hydroxylase)	H+ + L-kynurenine + NADPH + O2 = 3-hydroxy-L-kynurenine + H2O + NADP+		FAD
Monooxygenase	Flavin-dependent monooxygenase	Q8TDZ2	MICAL1	MICAL1 MICAL NICAL	[F-actin]-monooxygenase MICAL1 (EC 1.14.13.225) (Molecule interacting with CasL protein 1) (MICAL-1) (NEDD9-interacting protein with calponin homology and LIM domains)	H+ + L-methionyl-[F-actin] + NADPH + O2 = H2O + L-methionyl-(R)-S-oxide-[F-actin] + NADP+		FAD
Monooxygenase	Flavin-dependent monooxygenase	O94851	MICAL2	MICAL2 KIAA0750 MICAL2PV1 MICAL2PV2	[F-actin]-monooxygenase MICAL2 (EC 1.14.13.225) (Molecule interacting with CasL protein 2) (MICAL-2)	H+ + L-methionyl-[F-actin] + NADPH + O2 = H2O + L-methionyl-(R)-S-oxide-[F-actin] + NADP+		FAD
Monooxygenase	Flavin-dependent monooxygenase	Q7RTP6	MICAL3	MICAL3 KIAA0819 KIAA1364	[F-actin]-monooxygenase MICAL3 (EC 1.14.13.225) (Molecule interacting with CasL protein 3) (MICAL-3)	H+ + L-methionyl-[F-actin] + NADPH + O2 = H2O + L-methionyl-(R)-S-oxide-[F-actin] + NADP+		FAD
Monooxygenase	Flavin-dependent monooxygenase	Q9Y2Z9	COQ6	COQ6 CGI-10	Ubiquinone biosynthesis monooxygenase COQ6, mitochondrial (EC 1.14.13.-) (Coenzyme Q10 monooxygenase 6)	4-hydroxy-3-all-trans-hexaprenylbenzoate + 2 H+ + O2 + 2 reduced [2Fe-2S]-[ferredoxin] = 3,4-dihydroxy-5-all-trans-hexaprenylbenzoate + H2O + 2 oxidized [2Fe-2S]-[ferredoxin]		FAD
Monooxygenase	Flavin-dependent monooxygenase	Q14534	SQLE	SQLE ERG1	Squalene monooxygenase (EC 1.14.14.17) (Squalene epoxidase) (SE)	O2 + reduced [NADPH—hemoprotein reductase] + squalene = (S)-2,3-epoxysqualene + H+ + H2O + oxidized [NADPH—hemoprotein reductase]		FAD
Monooxygenase		Q99807	COQ7	COQ7	5-demethoxyubiquinone hydroxylase, mitochondrial (DMQ hydroxylase) (EC 1.14.13.-) (Timing protein clk-1 homolog) (Ubiquinone biosynthesis monooxygenase COQ7)	Catalyzes the hydroxylation of 2-polyprenyl-3-methyl-6-methoxy-1,4-benzoquinol (DMQH2) during ubiquinone biosynthesis.
Monooxygenase		Q96A73	KIAA1191	KIAA1191 P33MONOX	Putative monooxygenase p33MONOX (EC 1.-.-.-) (Brain-derived rescue factor p60MONOX) (Flavin monooxygenase motif-containing protein of 33 kDa)	Potential NADPH-dependent oxidoreductase
Oxidase	Heme-copper	P00395	MT-CO1	MT-CO1 COI COXI MTCO1	Cytochrome c oxidase subunit 1 (EC 1.9.3.1) (Cytochrome c oxidase polypeptide I)	4 [Fe(II)cytochrome c] + 4 H+ + O2 = 4 [Fe(III)cytochrome c] + 2 H2O	Fe, Fe, Cu	Heme, Heme	His376; His378; His240, His290, His 291	Discussed in section 'Heme-copper oxidases'.
Oxidase	Fe-dependent oxidase	O00767	SCD	SCD	Acyl-CoA desaturase (EC 1.14.19.1) (Delta(9)-desaturase) (Delta-9 desaturase) (Fatty acid desaturase) (Stearoyl-CoA desaturase) (hSCD1)	2 [Fe(II)-cytochrome b5] + 2 H+ + O2 + octadecanoyl-CoA = (9Z)-octadecenoyl-CoA + 2 [Fe(III)-cytochrome b5] + 2 H2O	Fe, Fe		His120, His125, His157, His161, His301; His160, His269, His298, His302	Discussed in section 'Iron-dependent oxidases'.
Oxidase	Fe-dependent oxidase	Q86SK9	SCD5	SCD5 ACOD4 SCD2 SCD4	Stearoyl-CoA desaturase 5 (EC 1.14.19.1) (Acyl-CoA-desaturase 4) (HSCD5) (Stearoyl-CoA 9-desaturase) (Stearoyl-CoA desaturase 2)	2 [Fe(II)-cytochrome b5] + 2 H+ + O2 + octadecanoyl-CoA = (9Z)-octadecenoyl-CoA + 2 [Fe(III)-cytochrome b5] + 2 H2O	Fe, Fe
Oxidase	Fe-dependent oxidase	O75845	SC5D	SC5D SC5DL	Lathosterol oxidase (EC 1.14.19.20) (C-5 sterol desaturase) (Delta(7)-sterol 5-desaturase) (Delta(7)-sterol C5(6)-desaturase) (Lathosterol 5-desaturase) (Sterol-C5-desaturase)	2 [Fe(II)-cytochrome b5] + a Δ7-sterol + 2 H+ + O2 = 2 [Fe(III)-cytochrome b5] + a Δ5,Δ7-sterol + 2 H2O	Fe, Fe
Oxidase	Fe-dependent oxidase	Q7L5A8	FA2H	FA2H FAAH FAXDC1	Fatty acid 2-hydroxylase (EC 1.14.18.-) (Fatty acid alpha-hydroxylase) (Fatty acid hydroxylase domain-containing protein 1)	2 [Fe(II)-cytochrome b5] + a 1,2-saturated fatty acid + 2 H+ + O2 = 2 [Fe(III)-cytochrome b5] + a (R)-2-hydroxy fatty acid + H2O	Fe, Fe
Oxidase	Fe-dependent oxidase	O60427	FADS1	FADS1 FADSD5	Acyl-CoA (8-3)-desaturase (EC 1.14.19.44) (Delta(5) fatty acid desaturase) (D5D) (Delta(5) desaturase) (Delta-5 desaturase) (Fatty acid desaturase 1)	(8Z,11Z,14Z)-eicosatrienoyl-CoA + 2 [Fe(II)-cytochrome b5] + 2 H+ + O2 = (5Z,8Z,11Z,14Z)-eicosatetraenoyl-CoA + 2 [Fe(III)-cytochrome b5] + 2 H2O	Fe, Fe
Oxidase	Fe-dependent oxidase	O95864	FADS2	FADS2	Acyl-CoA 6-desaturase (EC 1.14.19.3) (Delta(6) fatty acid desaturase) (D6D) (Delta(6) desaturase) (Delta-6 desaturase) (Fatty acid desaturase 2)	(9Z,12Z)-octadecadienoyl-CoA + 2 [Fe(II)-cytochrome b5] + 2 H+ + O2 = (6Z,9Z,12Z)-octadecatrienoyl-CoA + 2 [Fe(III)-cytochrome b5] + 2 H2O	Fe, Fe
Oxidase	Fe-dependent oxidase	Q9Y5Q0	FADS3	FADS3 CYB5RP	Fatty acid desaturase 3 (EC 1.14.19.-) (Delta(13) fatty acid desaturase) (Delta(13) desaturase)	(11E)-octadecenoyl-CoA + 2 [Fe(II)-cytochrome b5] + 2 H+ + O2 = (11E,13Z)-octadecadienoyl-CoA + 2 [Fe(III)-cytochrome b5] + 2 H2O	Fe, Fe
Oxidase	Fe-dependent oxidase	O15121	DEGS1	DEGS1 DES1 MLD MIG15	Sphingolipid delta(4)-desaturase DES1 (EC 1.14.19.17) (Cell migration-inducing gene 15 protein) (Degenerative spermatocyte homolog 1) (Membrane lipid desaturase)	2 [Fe(II)-cytochrome b5] + an N-acylsphinganine + 2 H+ + O2 = 2 [Fe(III)-cytochrome b5] + an N-acylsphing-4-enine + 2 H2O	Fe, Fe
Oxidase	Fe-dependent oxidase	Q6QHC5	DEGS2	DEGS2 C14orf66	Sphingolipid delta(4)-desaturase/C4-monooxygenase DES2 (EC 1.14.18.5) (EC 1.14.19.17) (Degenerative spermatocyte homolog 2) (Sphingolipid 4-desaturase) (Sphingolipid C4-monooxygenase)	2 [Fe(II)-cytochrome b5] + a dihydroceramide + 2 H+ + O2 = 2 [Fe(III)-cytochrome b5] + a phytoceramide + H2O	Fe, Fe
Oxidase	Fe-dependent oxidase	P02794	FTH1	FTH1 FTH FTHL6 OK/SW-cl.84 PIG15	Ferritin heavy chain (Ferritin H subunit) (EC 1.16.3.1) (Cell proliferation-inducing gene 15 protein) [Cleaved into: Ferritin heavy chain, N-terminally processed]	4 Fe2+ + 4 H+ + O2 = 4 Fe3+ + 2 H2O	Fe, Fe		Glu28, Glu63, His66; Glu63, Glu108, Gln142
Oxidase	Fe-dependent oxidase	Q16595	FXN	FXN FRDA X25	Frataxin, mitochondrial (EC 1.16.3.1) (Friedreich ataxia protein) (Fxn) [Cleaved into: Frataxin intermediate form (i-FXN); Frataxin(56-210) (m56-FXN); Frataxin(78-210) (d-FXN) (m78-FXN); Frataxin mature form (Frataxin(81-210)) (m81-FXN)]	4 Fe2+ + 4 H+ + O2 = 4 Fe3+ + 2 H2O	Fe, Fe
Oxidase	Fe-dependent oxidase	Q8N4E7	FTMT	FTMT	Ferritin, mitochondrial (EC 1.16.3.1)	4 Fe2+ + 4 H+ + O2 = 4 Fe3+ + 2 H2O	Fe, Fe		Glu87, Glu122, His125; Glu122, Glu167, Gln201
Oxidase	Fe-dependent oxidase	P00450	CP	CP	Ceruloplasmin (EC 1.16.3.1) (Ferroxidase)	4 Fe2+ + 4 H+ + O2 = 4 Fe3+ + 2 H2O	Fe, Fe
Oxidase	Fe-dependent oxidase	Q6MZM0	HEPHL1	HEPHL1	Ferroxidase HEPHL1 (EC 1.16.3.1) (Hephaestin-like protein 1)	4 Fe2+ + 4 H+ + O2 = 4 Fe3+ + 2 H2O	Fe, Fe
Oxidase	Cu-dependent oxidase	P19801	AOC1	AOC1 ABP1 DAO1	Amiloride-sensitive amine oxidase [copper-containing] (DAO) (Diamine oxidase) (EC 1.4.3.22) (Amiloride-binding protein 1) (Amine oxidase copper domain-containing protein 1) (Histaminase) (Kidney amine oxidase) (KAO)	H2O + histamine + O2 = H2O2 + imidazole-4-acetaldehyde + NH4+	Cu	L-topaquinone	His510, His512,His675
Oxidase	Cu-dependent oxidase	O75106	AOC2	AOC2	Retina-specific copper amine oxidase (RAO) (EC 1.4.3.21) (Amine oxidase [copper-containing]) (Semicarbazide-sensitive amine oxidase) (SSAO)	an aliphatic amine + H2O + O2 = an aldehyde + H2O2 + NH4+	Cu	L-topaquinone	His516, His518,His680
Oxidase	Cu-dependent oxidase	Q16853	AOC3	AOC3 VAP1	Membrane primary amine oxidase (EC 1.4.3.21) (Copper amine oxidase) (HPAO) (Semicarbazide-sensitive amine oxidase) (SSAO) (Vascular adhesion protein 1) (VAP-1)	an aliphatic amine + H2O + O2 = an aldehyde + H2O2 + NH4+	Cu	L-topaquinone	His520, His522,His684	Discussed in section 'Copper-dependent oxidases'.
Oxidase	Cu-dependent oxidase	P28300	LOX	LOX	Protein-lysine 6-oxidase (EC 1.4.3.13) (Lysyl oxidase) [Cleaved into: Protein-lysine 6-oxidase, long form; Protein-lysine 6-oxidase, short form]	H2O + L-lysyl-[protein] + O2 = [protein]-(S)-2-amino-6-oxohexanoate + H2O2 + NH4+	Cu	lysine tyrosylquinone residue	His292, His294, His296
Oxidase	Cu-dependent oxidase	Q9Y4K0	LOXL2	LOXL2	Lysyl oxidase homolog 2 (EC 1.4.3.13) (Lysyl oxidase-like protein 2) (Lysyl oxidase-related protein 2) (Lysyl oxidase-related protein WS9-14)	H2O + L-lysyl-[protein] + O2 = [protein]-(S)-2-amino-6-oxohexanoate + H2O2 + NH4+	Cu	lysine tyrosylquinone residue	His626, His628, His630
Oxidase	Cu-dependent oxidase	P58215	LOXL3	LOXL3 LOXL	Lysyl oxidase homolog 3 (EC 1.4.3.-) (EC 1.4.3.13) (Lysyl oxidase-like protein 3)	H2O + L-lysyl-[protein] + O2 = [protein]-(S)-2-amino-6-oxohexanoate + H2O2 + NH4+	Cu	lysine tyrosylquinone residue	His607, His609, His611
Oxidase	Cu-dependent oxidase	Q8NBK3	SUMF1	SUMF1 PSEC0152 UNQ3037/PRO9852	Formylglycine-generating enzyme (FGE) (EC 1.8.3.7) (C-alpha-formylglycine-generating enzyme 1) (Sulfatase-modifying factor 1)	2 a thiol + L-cysteinyl-[sulfatase] + O2 = 3-oxo-L-alanyl-[sulfatase] + an organic disulfide + H+ + H2O + hydrogen sulfide	Cu		Cys336, Cys341
Oxidase	Flavin-dependent oxidase	Q15067	ACOX1	ACOX1 ACOX	Peroxisomal acyl-coenzyme A oxidase 1 (AOX) (EC 1.3.3.6) (Palmitoyl-CoA oxidase) (Straight-chain acyl-CoA oxidase) (SCOX) [Cleaved into: Peroxisomal acyl-CoA oxidase 1, A chain; Peroxisomal acyl-CoA oxidase 1, B chain; Peroxisomal acyl-CoA oxidase 1, C chain]	a 2,3-saturated acyl-CoA + O2 = a (2E)-enoyl-CoA + H2O2		FAD
Oxidase	Flavin-dependent oxidase	Q99424	ACOX2	ACOX2	Peroxisomal acyl-coenzyme A oxidase 2 (EC 1.17.99.3) (3-alpha,7-alpha,12-alpha-trihydroxy-5-beta-cholestanoyl-CoA 24-hydroxylase) (3-alpha,7-alpha,12-alpha-trihydroxy-5-beta-cholestanoyl-CoA oxidase) (Trihydroxycoprostanoyl-CoA oxidase) (THCA-CoA oxidase) (THCCox)	(25S)-3α,7α,12α-trihydroxy-5β-cholestan-26-oyl-CoA + O2 = (24E)-3α,7α,12α-trihydroxy-5β-cholest-24-en-26-oyl-CoA + H2O2		FAD
Oxidase	Flavin-dependent oxidase	O15254	ACOX3	ACOX3 BRCOX PRCOX	Peroxisomal acyl-coenzyme A oxidase 3 (EC 1.3.3.6) (Branched-chain acyl-CoA oxidase) (BRCACox) (Pristanoyl-CoA oxidase)	a 2,3-saturated acyl-CoA + O2 = a (2E)-enoyl-CoA + H2O2		FAD
Oxidase	Flavin-dependent oxidase	Q6QHF9	PAOX	PAOX PAO UNQ1923/PRO4398	Peroxisomal N(1)-acetyl-spermine/spermidine oxidase (EC 1.5.3.13) (Polyamine oxidase)	H2O + N1-acetylspermine + O2 = 3-acetamidopropanal + H2O2 + spermidine		FAD
Oxidase	Flavin-dependent oxidase	Q9P0Z9	PIPOX	PIPOX LPIPOX PSO	Peroxisomal sarcosine oxidase (PSO) (EC 1.5.3.1) (EC 1.5.3.7) (L-pipecolate oxidase) (L-pipecolic acid oxidase)	H2O + O2 + sarcosine = formaldehyde + glycine + H2O2		FAD
Oxidase	Flavin-dependent oxidase	Q9NUZ1	ACOXL	ACOXL	Acyl-coenzyme A oxidase-like protein (Acyl-CoA oxidase-like protein) (EC 1.3.3.-)			FAD
Oxidase	Flavin-dependent oxidase	Q06278	AOX1	AOX1 AO	Aldehyde oxidase (EC 1.2.3.1) (Aldehyde oxidase 1) (Azaheterocycle hydroxylase) (EC 1.17.3.-)	an aldehyde + H2O + O2 = a carboxylate + H+ + H2O2		FAD
Oxidase	Flavin-dependent oxidase	P14920	DAO	DAO DAMOX	D-amino-acid oxidase (DAAO) (DAMOX) (DAO) (EC 1.4.3.3)	a D-α-amino acid + H2O + O2 = a 2-oxocarboxylate + H2O2 + NH4+		FAD
Oxidase	Flavin-dependent oxidase	Q99489	DDO	DDO	D-aspartate oxidase (DASOX) (DDO) (EC 1.4.3.1)	D-aspartate + H2O + O2 = H2O2 + NH4+ + oxaloacetate		FAD
Oxidase	Flavin-dependent oxidase	Q96RQ9	IL4I1	IL4I1 FIG1 UNQ636/PRO1265	L-amino-acid oxidase (LAAO) (LAO) (EC 1.4.3.2) (Interleukin-4-induced protein 1) (IL4-induced protein 1) (Protein Fig-1) (hFIG1)	an L-α-amino acid + H2O + O2 = a 2-oxocarboxylate + H2O2 + NH4+		FAD
Oxidase	Flavin-dependent oxidase	P55789	GFER	GFER ALR HERV1 HPO	FAD-linked sulfhydryl oxidase ALR (EC 1.8.3.2) (Augmenter of liver regeneration) (hERV1) (Hepatopoietin)	O2 + 2 R'C(R)SH = H2O2 + R'C(R)S-S(R)CR'		FAD
Oxidase	Flavin-dependent oxidase	O60341	KDM1A	KDM1A AOF2 KDM1 KIAA0601 LSD1	Lysine-specific histone demethylase 1A (EC 1.-.-.-) (BRAF35-HDAC complex protein BHC110) (Flavin-containing amine oxidase domain-containing protein 2)	demethylate both 'Lys-4' (H3K4me) and 'Lys-9' (H3K9me) of histone H3		FAD
Oxidase	Flavin-dependent oxidase	Q8NB78	KDM1B	KDM1B AOF1 C6orf193 LSD2	Lysine-specific histone demethylase 1B (EC 1.-.-.-) (Flavin-containing amine oxidase domain-containing protein 1) (Lysine-specific histone demethylase 2)	demethylates 'Lys-4' of histone H3		FAD
Oxidase	Flavin-dependent oxidase	P21397	MAOA	MAOA	Amine oxidase [flavin-containing] A (EC 1.4.3.4) (Monoamine oxidase type A) (MAO-A)	a secondary aliphatic amine + H2O + O2 = a primary amine + an aldehyde + H2O2		FAD
Oxidase	Flavin-dependent oxidase	P27338	MAOB	MAOB	Amine oxidase [flavin-containing] B (EC 1.4.3.4) (Monoamine oxidase type B) (MAO-B)	a secondary aliphatic amine + H2O + O2 = a primary amine + an aldehyde + H2O2		FAD
Oxidase	Flavin-dependent oxidase	Q9UHG3	PCYOX1	PCYOX1 KIAA0908 PCL1 UNQ597/PRO1183	Prenylcysteine oxidase 1 (EC 1.8.3.5) (Prenylcysteine lyase)	an S-prenyl-L-cysteine + H2O + O2 = a prenal + H2O2 + L-cysteine		FAD
Oxidase	Flavin-dependent oxidase	P50336	PPOX	PPOX	Protoporphyrinogen oxidase (PPO) (EC 1.3.3.4)	3 O2 + protoporphyrinogen IX = 3 H2O2 + protoporphyrin IX		FAD
Oxidase	Flavin-dependent oxidase	O00391	QSOX1	QSOX1 QSCN6 UNQ2520/PRO6013	Sulfhydryl oxidase 1 (hQSOX) (EC 1.8.3.2) (Quiescin Q6)	O2 + 2 R'C(R)SH = H2O2 + R'C(R)S-S(R)CR'		FAD
Oxidase	Flavin-dependent oxidase	Q6ZRP7	QSOX2	QSOX2 QSCN6L1 SOXN	Sulfhydryl oxidase 2 (EC 1.8.3.2) (Neuroblastoma-derived sulfhydryl oxidase) (Quiescin Q6-like protein 1)	O2 + 2 R'C(R)SH = H2O2 + R'C(R)S-S(R)CR'		FAD
Oxidase	Flavin-dependent oxidase	Q5VYX0	RNLS	RNLS C10orf59	Renalase (EC 1.6.3.5) (Monoamine oxidase-C) (MAO-C)	1,2-dihydro-β-NAD + H+ + O2 = H2O2 + NAD+		FAD
Oxidase	Flavin-dependent oxidase	Q9NWM0	SMOX	SMOX C20orf16 SMO UNQ3039/PRO9854	Spermine oxidase (EC 1.5.3.16) (Polyamine oxidase 1) (PAO-1) (PAOh1)	H2O + O2 + spermine = 3-aminopropanal + H2O2 + spermidine		FAD
Oxidase	Flavin-dependent oxidase	P47989	XDH	XDH XDHA	Xanthine dehydrogenase/oxidase [Includes: Xanthine dehydrogenase (XD) (EC 1.17.1.4); Xanthine oxidase (XO) (EC 1.17.3.2) (Xanthine oxidoreductase) (XOR)]	H2O + O2 + xanthine = H2O2 + urate		FAD
Oxidase	Flavin-dependent oxidase	Q9UJM8	HAO1	HAO1 GOX1 HAOX1	Hydroxyacid oxidase 1 (HAOX1) (EC 1.1.3.15) (Glycolate oxidase) (GOX)	a (2S)-2-hydroxycarboxylate + O2 = a 2-oxocarboxylate + H2O2		FMN
Oxidase	Flavin-dependent oxidase	Q9NYQ3	HAO2	HAO2 HAOX2 GIG16	Hydroxyacid oxidase 2 (HAOX2) (EC 1.1.3.15) ((S)-2-hydroxy-acid oxidase, peroxisomal) (Cell growth-inhibiting gene 16 protein) (Long chain alpha-hydroxy acid oxidase) (Long-chain L-2-hydroxy acid oxidase)	a (2S)-2-hydroxycarboxylate + O2 = a 2-oxocarboxylate + H2O2		FMN
Oxidase	Flavin-dependent oxidase	Q9NVS9	PNPO	PNPO	Pyridoxine-5'-phosphate oxidase (EC 1.4.3.5) (Pyridoxamine-phosphate oxidase)	H2O + O2 + pyridoxamine 5'-phosphate = H2O2 + NH4+ + pyridoxal 5'-phosphate		FMN
Oxidase		A5PLL7	TMEM189	TMEM189 KUA	Plasmanylethanolamine desaturase (EC 1.14.99.19) (Transmembrane protein 189)	1-(1,2-saturated alkyl)-2-acyl-sn-glycero-3-phosphoethanolamine + AH2 + O2 = 1-O-(1Z-alkenyl)-2-acyl-sn-glycero-3-phosphoethanolamine + A + 2 H2O
Oxidase		P36551	CPOX	CPOX CPO CPX	Oxygen-dependent coproporphyrinogen-III oxidase, mitochondrial (COX) (Coprogen oxidase) (Coproporphyrinogenase) (EC 1.3.3.3)	coproporphyrinogen III + 2 H+ + O2 = 2 CO2 + 2 H2O + protoporphyrinogen IX
Oxidase		Q13228	SELENBP1	SELENBP1 SBP	Methanethiol oxidase (MTO) (EC 1.8.3.4) (56 kDa selenium-binding protein) (SBP56) (SP56) (Selenium-binding protein 1)	H2O + methanethiol + O2 = formaldehyde + H+ + H2O2 + hydrogen sulfid
Oxidase		Q9NRD9	DUOX1	DUOX1 DUOX LNOX1 THOX1	Dual oxidase 1 (EC 1.11.1.-) (EC 1.6.3.1) (Large NOX 1) (Long NOX 1) (NADPH thyroid oxidase 1) (Thyroid oxidase 1)	H+ + NADH + O2 = H2O2 + NAD+
Oxidase		Q9NRD8	DUOX2	DUOX2 LNOX2 THOX2	Dual oxidase 2 (EC 1.11.1.-) (EC 1.6.3.1) (Large NOX 2) (Long NOX 2) (NADH/NADPH thyroid oxidase p138-tox) (NADPH oxidase/peroxidase DUOX2) (NADPH thyroid oxidase 2) (Thyroid oxidase 2) (p138 thyroid oxidase)	H+ + NADH + O2 = H2O2 + NAD+				Discussed in section 'Other oxidases'.
